# Supplementary material for: An ancient family of lytic polysaccharide monooxygenases with roles in arthropod development and biomass digestion
Source: PubMed Central journal article supplement (PMC5823890; doi:10.1038/s41467-018-03142-x), 2018-02-22
Supplement: 41467_2018_3142_MOESM1_ESM.pdf [file 41467_2018_3142_MOESM1_ESM.pdf]

**Supplementary Information for:**

**An ancient family of lytic polysaccharide monooxygenases with  
roles in arthropod development and biomass digestion**

**Sabbadin *et al.***

## Supplementary Information

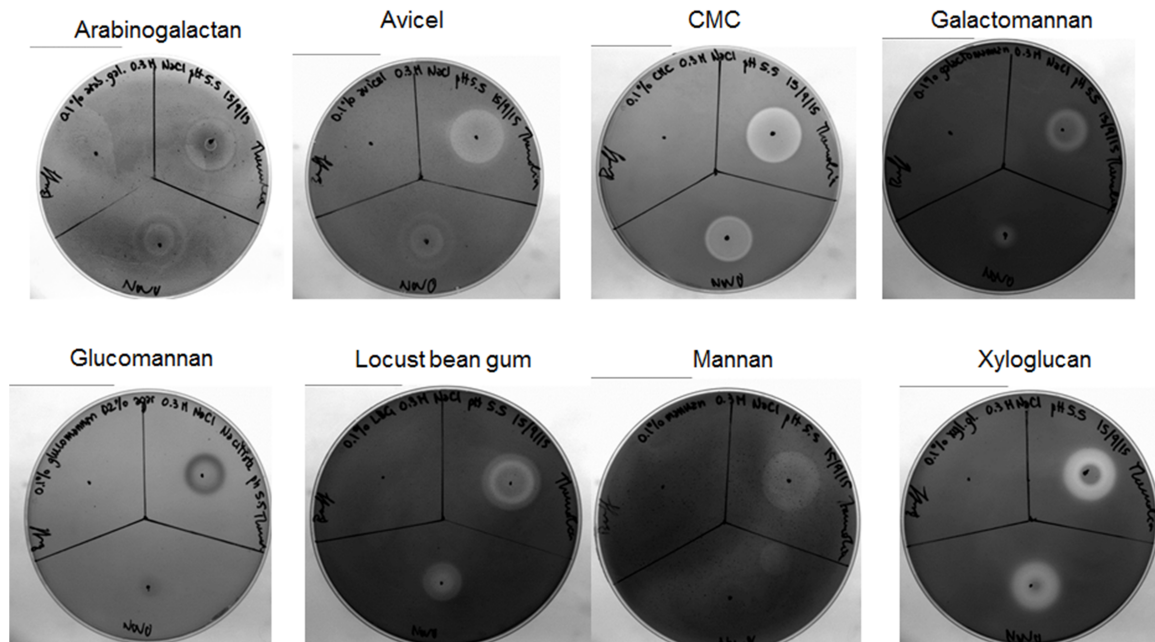

**Supplementary Figure 1 | Agar plate assays with soluble protein extract from *T. domestica*'s crop.**

Activity assays were carried out on agar plates containing 0.1 % substrate and stained with Congo Red. Each plate was divided in three sectors, spotted either with buffer control (top left), *T. domestica* crop extract (5.6 µg of soluble protein, top right) and positive control (1/100 dilution of Celluclast®, bottom). Clearance zones are visible on all substrates, indicating degradation of the polysaccharides by the protein extract of *Thermobia*.

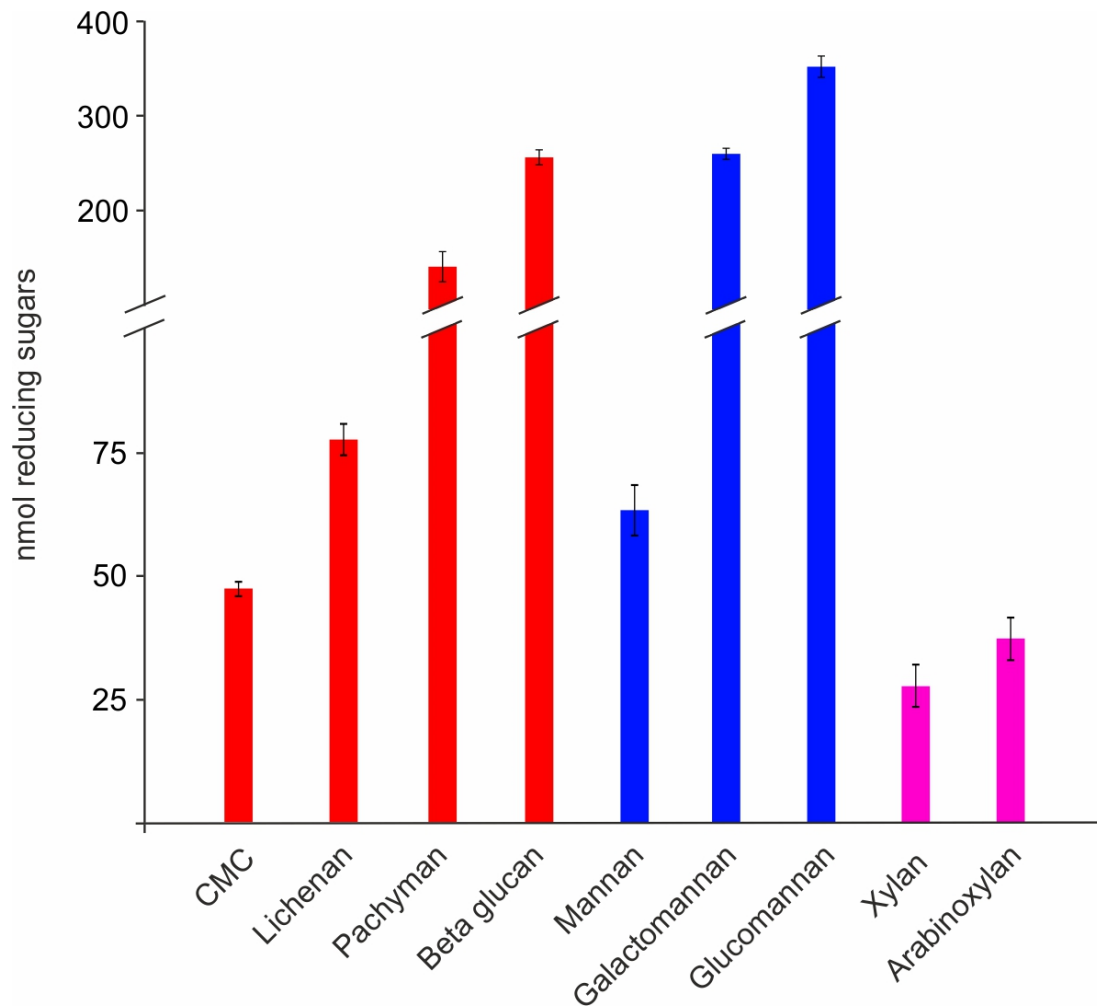

**Supplementary Figure 2 | Activity of the soluble extract of *Thermobia*'s crop on a panel of polysaccharides, determined with the dinitrosalicylic acid assay (DNS).**

Fifty  $\mu\text{L}$  reactions were performed in triplicate in a 96-well plate at 28  $^{\circ}\text{C}$  at 320 rpm using 2.8  $\mu\text{g}$  of protein and 2  $\text{mg mL}^{-1}$  substrate in 50 mM sodium phosphate buffer pH 6. After 3 hours, reactions were stopped by adding 100  $\mu\text{L}$  DNS reagent and heating for 10 min at 100  $^{\circ}\text{C}$ , and then absorbance at 540 nm was measured with a microplate reader. All values were blanked against non-enzyme control. Bars indicate means (error bars: standard deviations of three replicates).

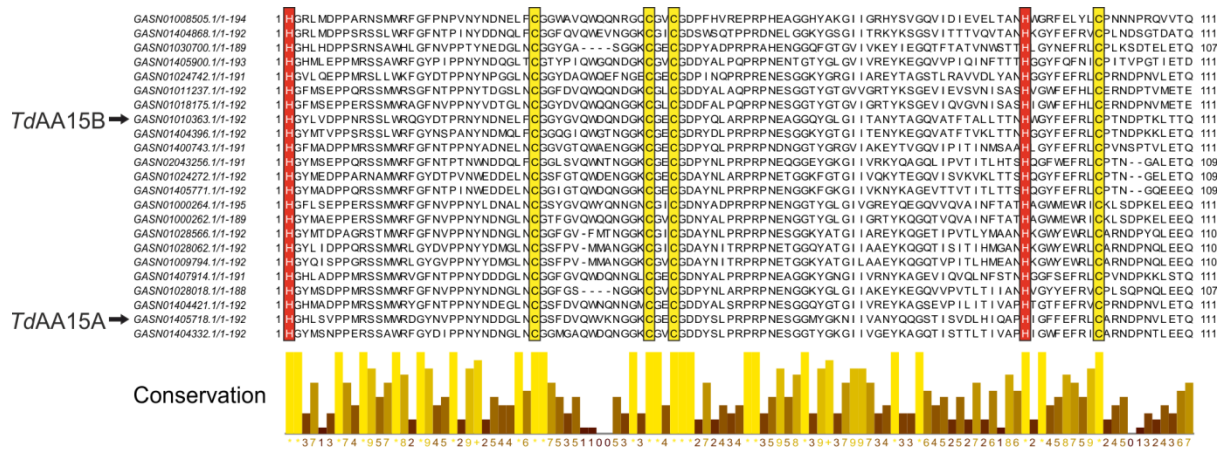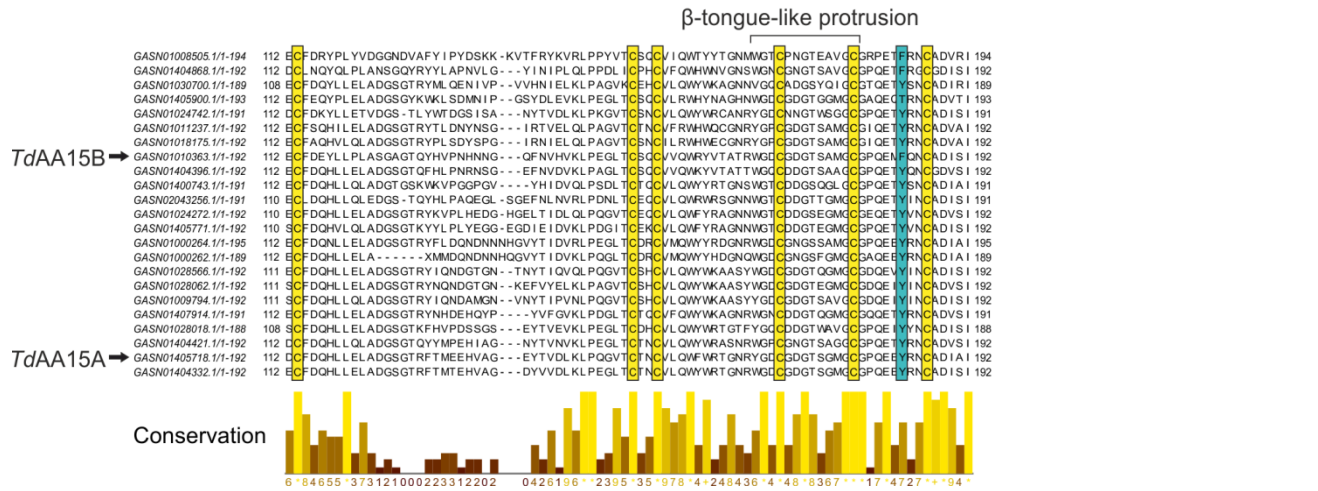

**Supplementary Figure 3 | Protein sequence alignment of mature LPMOs (without N-terminal signal peptide) found in the transcriptome of *T. domestica*.**

Twenty-three full length LPMO catalytic domains were identified. The conserved histidines involved in copper coordination and the conserved cysteines involved in disulfide bonds are highlighted with red and yellow boxes, respectively. The predicted axial residue is highlighted in blue. Proposed names for the two LPMOs characterized in this study are shown on the left-hand side of the figure. The amino acids involved in the formation of the β-tongue-like protrusion (identified from the X-ray structure of *TdAA15A*) are also indicated.

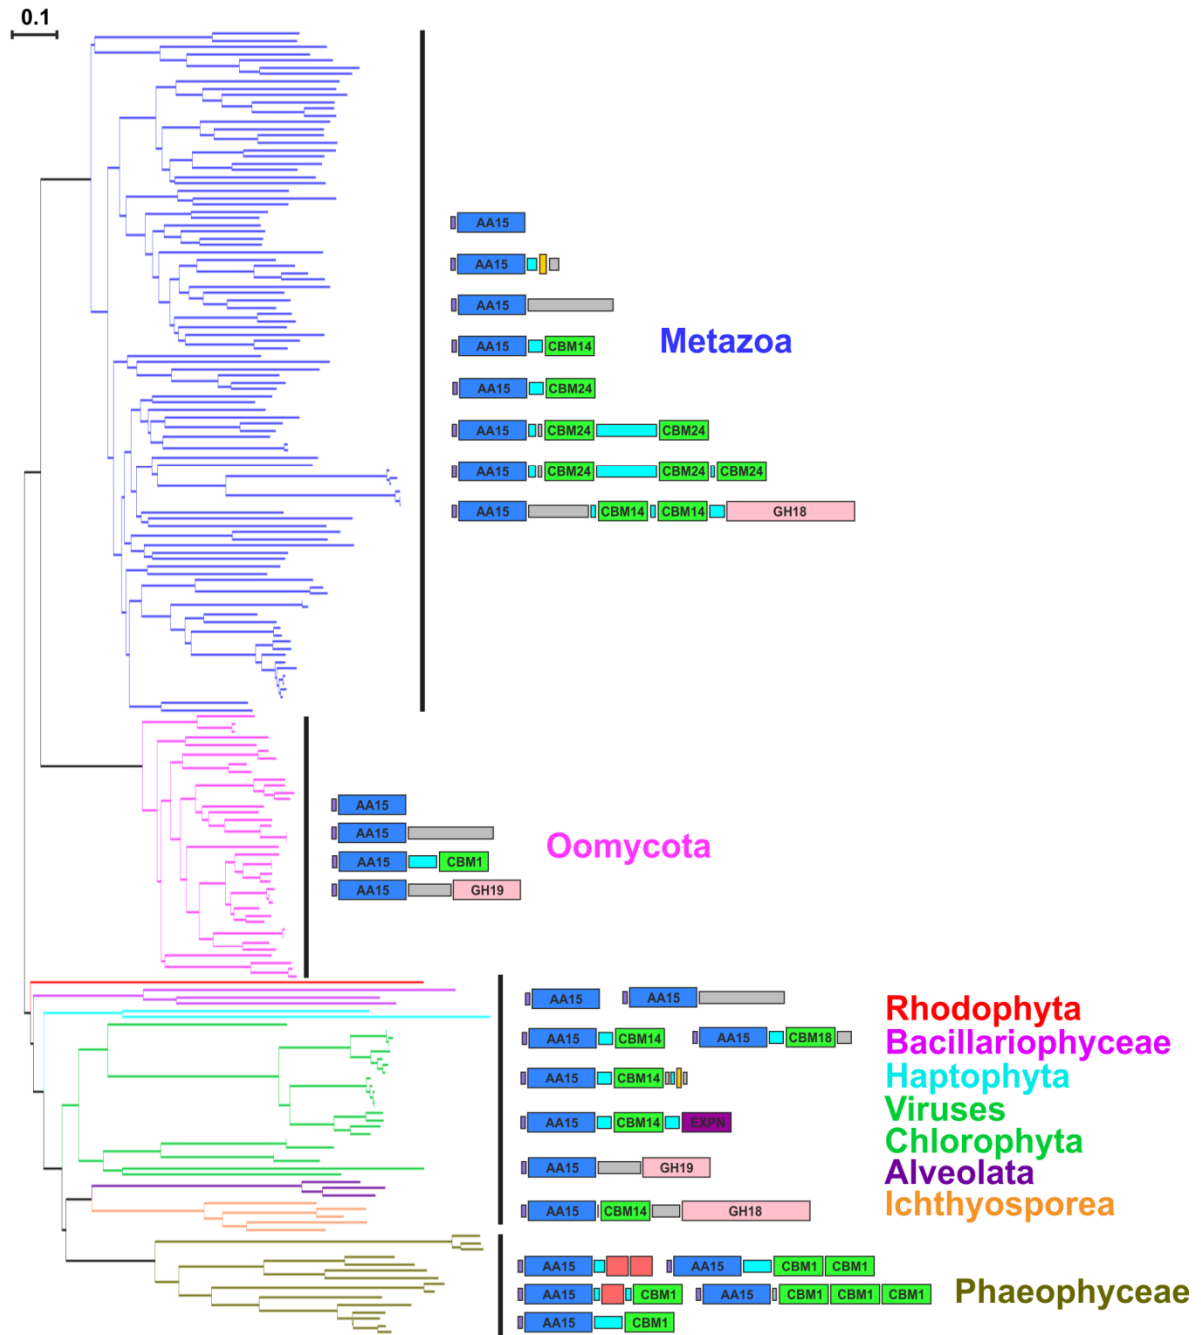

**Supplementary Figure 4 | Phylogenetic tree and functional domains of selected members of the AA15 family across Taxa.**

To avoid interference from the presence or absence of additional modules, the signal peptides and C-terminal extensions (see below) were removed. The resulting amino acid sequences corresponding to the catalytic domain were aligned using Muscle and built into a phylogenetic tree using the neighbor-joining method. The sequences on the tree were found to segregate according to taxonomy. While *Thermobia*'s sequences only correspond to the

LPMO catalytic domain, about a third of the members of the family harbor a C-terminal extension. Most of these C-terminal extensions could be identified as different carbohydrate-binding domain (CBM) families. Sequences from Phaeophyceae (*Ectocarpus siliculosus*) carry CBM1s, known to bind cellulose. By contrast CBM14s (known to bind chitin) were found in Chlorophyta (and viruses thereof) while family CBM18 (also chitin-binding) was found in Bacillariophyceae. Metazoa divided into two groups, with crustacean, mollusc and insect LPMOs occasionally appended to distant relatives of family CBM24 (too distant to propose a likely carbohydrate target) while all enzymes from *Oikopleura dioica* (a tunicate) carry CBM14 domains. Some viral AA15s were also found to be fused to a putative expansin domain (EXPN). Regions that did not contain the LPMO or putative CBMs are colored in red (domains/regions of unknown function, conserved in other CAZys), purple (signal peptide), cyan (P/T/S-rich linker peptide), yellow (transmembrane segment) and grey (unknown).

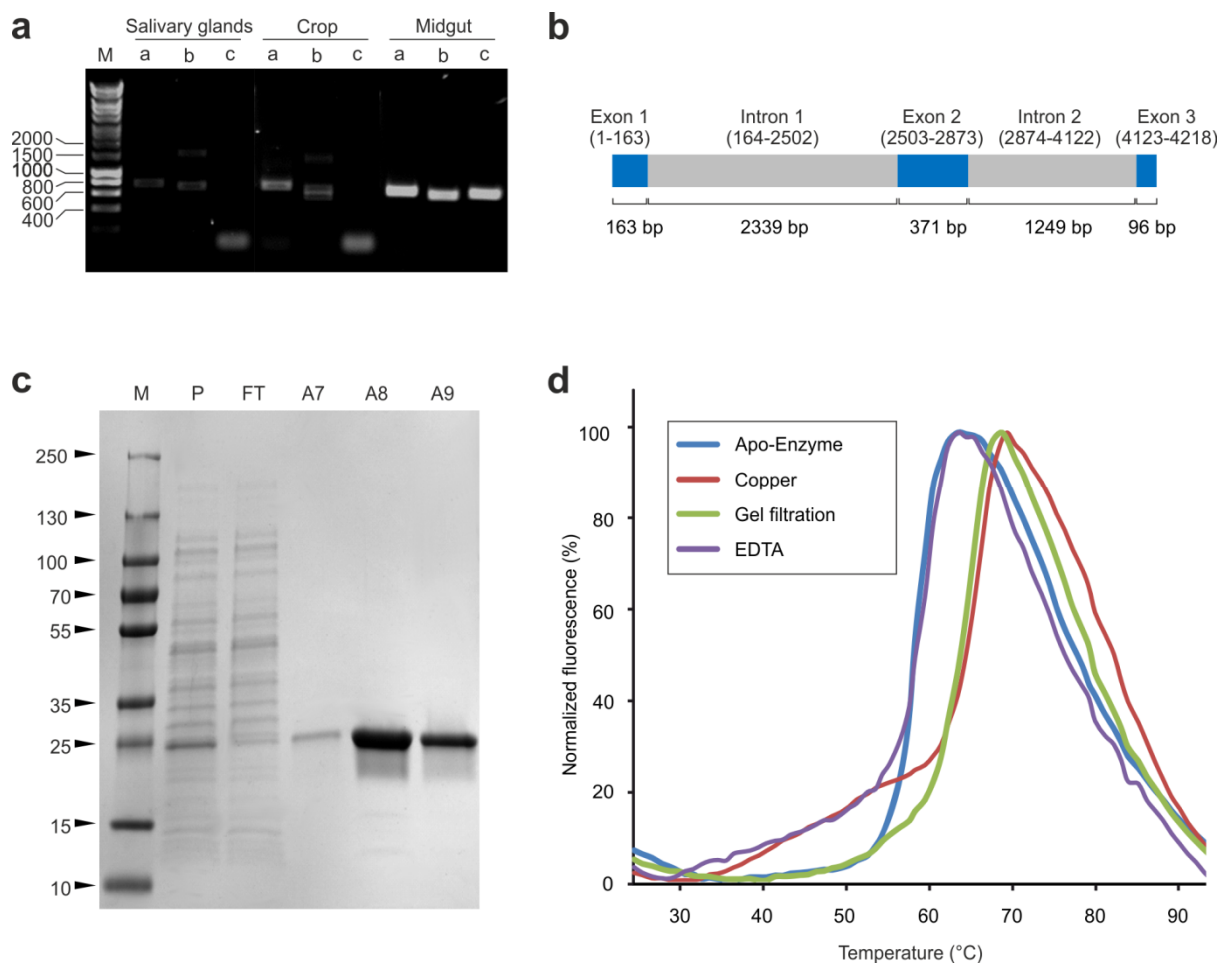

**Supplementary Figure 5 | Isolation of LPMO coding sequences from *T. domestica* and heterologous expression of *TdAA15A* in *E. coli*.** (a) RT-PCR carried out with cDNA template generated from equal amount of RNA extracted from pooled samples of salivary glands, crop and midgut of adult *T. domestica* grown on microcrystalline cellulose. Oligonucleotide primers were designed for LPMO cDNA sequences *GASN01405718.1* (corresponding to *TdAA15A*, lane a), *GASN01404332.1* (lane b) and *GASN01404396.1* (lane c). M = DNA marker. (b) Full gene structure of LPMO *GASN01030700.1*, showing the presence of three exons and two introns. The sequence was amplified from genomic DNA extracted from the legs of several specimens, cloned into a plasmid and sequenced *via* primer walking. The full gene sequence can be found in Supplementary Notes. (c) SDS-PAGE analysis of periplasmic extract of *E. coli* (P), flow through after passing the periplasmic extract into a 5 mL strep-tag affinity chromatography column (FT), fractions of the protein peak eluted with 2.5 mM desthiobiotin (A7, A8, A9). M: protein marker. Numbers on the left indicate the molecular weight in kDa. (d) Melting curves of the recombinant LMPO after strep-tag affinity chromatography (“Apo-Enzyme”,  $T_m$  58.5 °C), after metal loading with 5-

fold molar excess of CuSO<sub>4</sub> (“Copper”, T<sub>m</sub> 64 °C), after size-exclusion chromatography (“Gel filtration”, T<sub>m</sub> 64 °C) and after de-metallation with 10 mM EDTA (“EDTA”, T<sub>m</sub> 58.6 °C). A strong increase in thermal stability was observed upon addition of copper and was retained after gel filtration, indicating tight specific binding and protein-fold rearrangement. Such increase was completely reversed by the metal chelator EDTA.



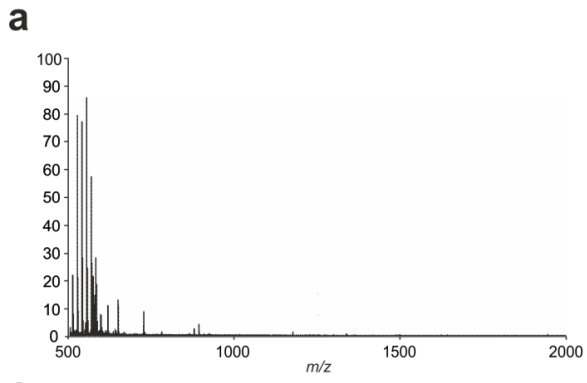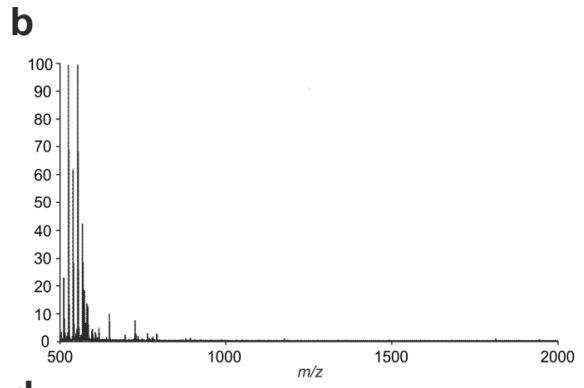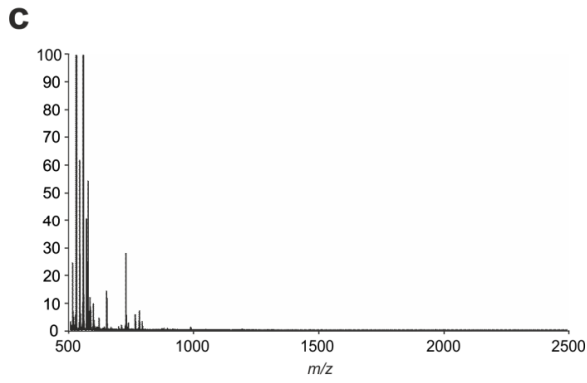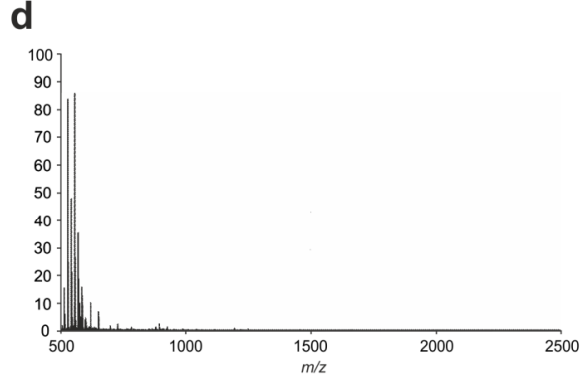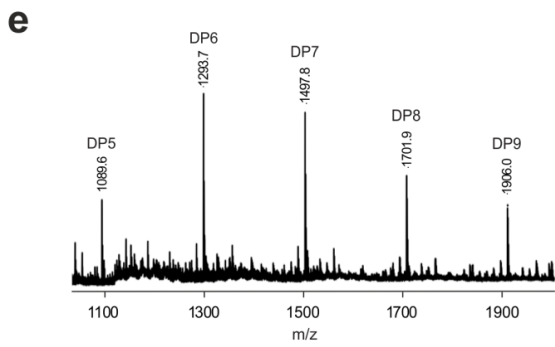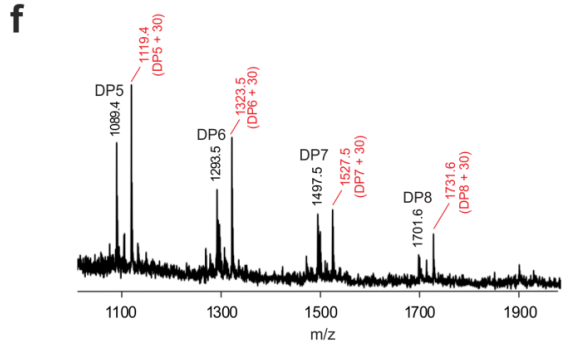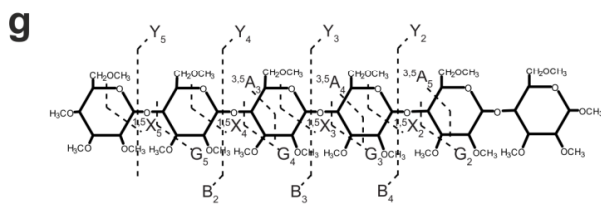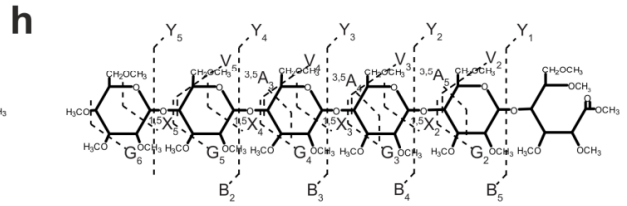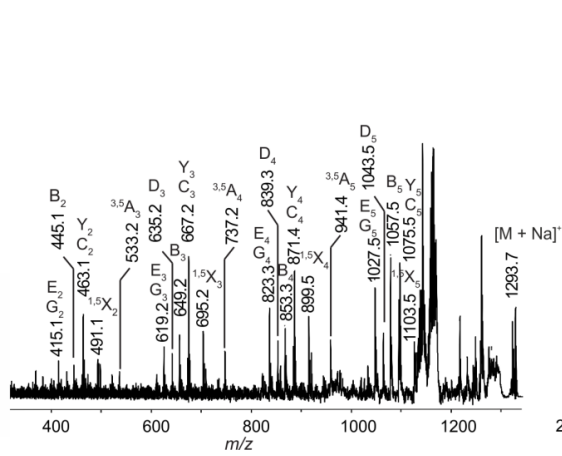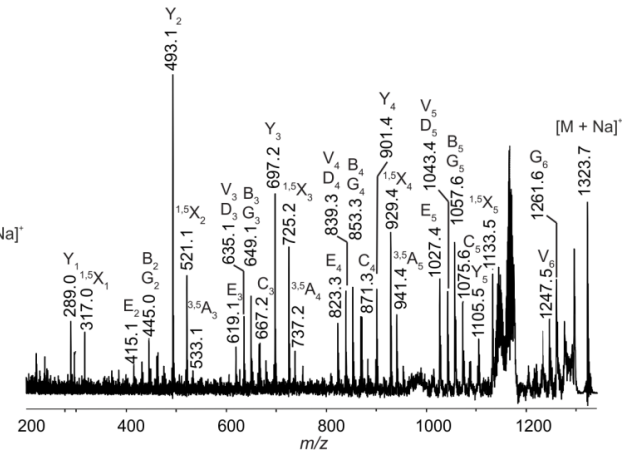

**Supplementary Figure 6 | MALDI-TOF MS of negative control assays for *TdAA15A* and MALDI-TOF/TOF MS/MS of permethylated products generated by *TdAA15A* when incubated with PASC and electron donor.**

(**a-d**) MALDI-TOF MS analysis of *in vitro* negative control activity assays with purified *TdAA15A*, under the same experimental conditions as in Figure 3a, b. The panels show spectra of products obtained after incubation of 4 mg mL<sup>-1</sup> microcrystalline cellulose (**a, b**) or  $\beta$ -chitin (**c, d**), either with 4 mM gallic acid (**a, c**) or 2  $\mu$ M *TdAA15A* (**b, d**) alone. The spectra do not show detectable amounts of native or oxidized cello-oligosaccharides. In **a-b** and **c-d**, 100% relative intensity represents 0.9 x 10<sup>4</sup> and 1.0 x 10<sup>4</sup> arbitrary units (a.u.), respectively. (**e-h**) Mass spectrometry analysis of permethylated products of LPMO cleavage of PASC. *TdAA15A* and PASC were incubated in the absence (**e**) or presence (**f**) of 4 mM gallic acid before permethylation and analysis by MALDI-TOF MS. With the LPMO and reducing agent, a series of additional products 30 Da greater than the cello-oligosaccharides was detected, consistent with an aldonic acid modification (C1-oxidation). (**g, h**) MALDI-TOF/TOF MS/MS of permethylated oligosaccharides. Diagrams show the origin of observed fragmentation ions. The nomenclature is according to Domon & Costello (1988)<sup>56</sup>. Fragmentation of the non-oxidized celohexaose [M+Na]<sup>+</sup>=1294 is shown in **g**, and the oxidized oligosaccharide [M+Na]<sup>+</sup>=1324 in **h**. The series of <sup>1,5</sup>X and Y ions comprising the reducing end of the oxidized species are 30 Da larger than those of the non-oxidized species, whereas the B ions comprising the non-reducing end are identical. Consequently, the oxidation is found on the reducing end residue.

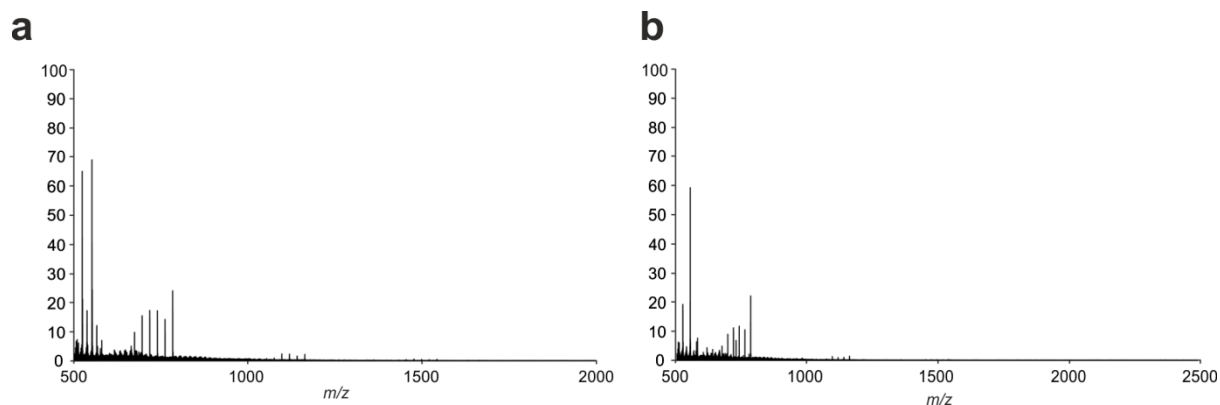

**Supplementary Figure 7 | MALDI-TOF MS of activity assays with *TdAA15A* in presence of EDTA.**

MALDI-TOF MS analysis of *in vitro* negative control activity assays with purified *TdAA15A*, under the same experimental conditions as in Figure 3a, b. The panels show spectra of products obtained after incubation of 4 mg mL<sup>-1</sup> microcrystalline cellulose (**a**) or  $\beta$ -chitin (**b**) with 2  $\mu$ M *TdAA15A*, 4 mM gallic acid and 10 mM EDTA. The spectra do not show detectable amounts of native or oxidized cello-oligosaccharides. In **a** and **b**, 100% relative intensity represents  $0.9 \times 10^4$  and  $1.0 \times 10^4$  arbitrary units (a.u.), respectively.

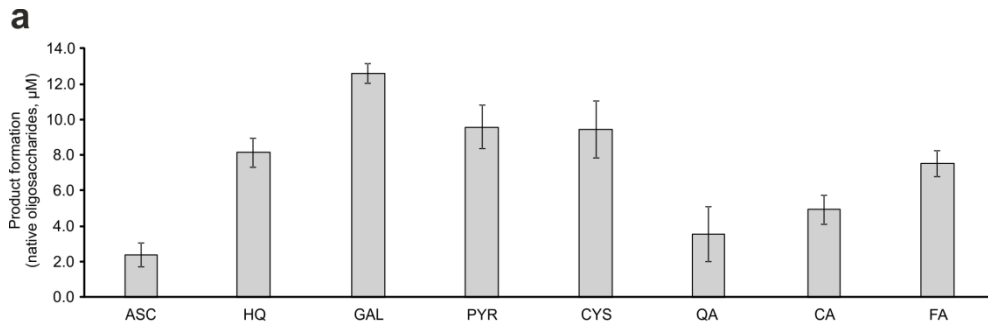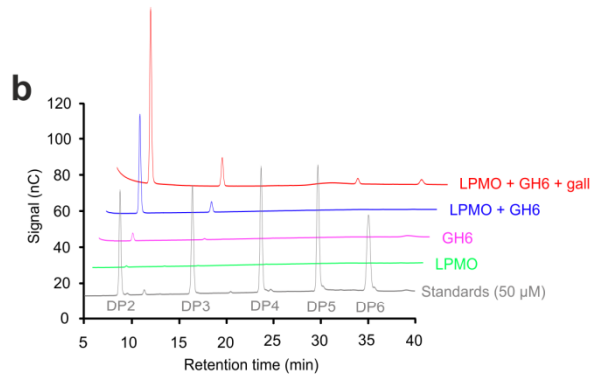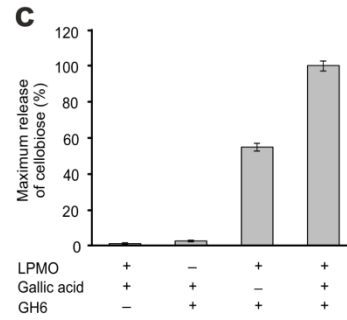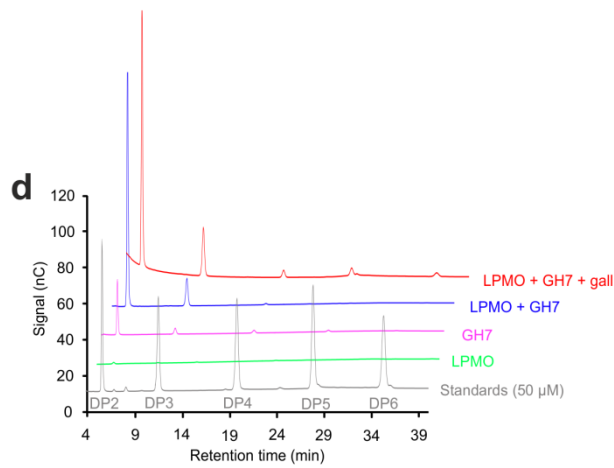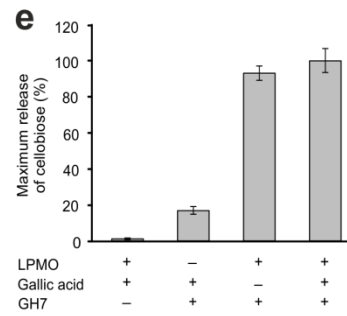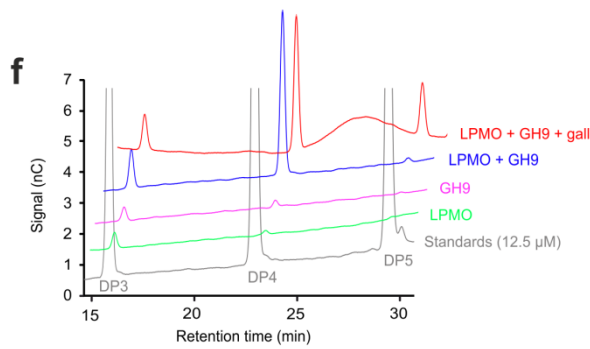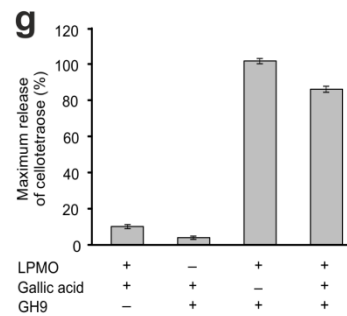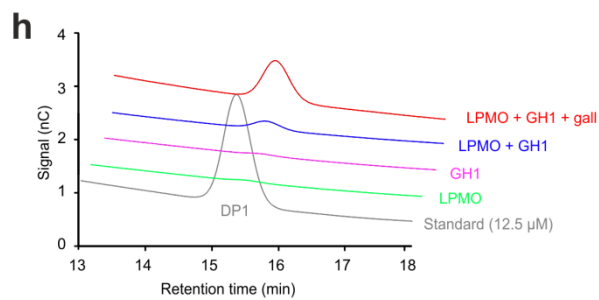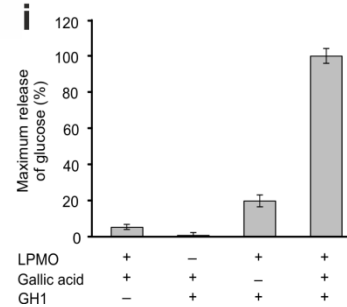

**Supplementary Figure 8 | Identification of the best electron donor and synergy experiments with purified *TdAA15A* using PASC as substrate.**

(a) Native oligosaccharides with a degree of polymerization from 2 to 6 were released from 1 mg mL<sup>-1</sup> PASC by the purified LPMO during 24-hour experiments in the presence of 1 mM reductant and quantified *via* HPAEC. ASC: ascorbic acid. HQ: hydroquinone. GAL: gallic acid. PYR: pyrogallol. CYS: cysteine. QA: quinic acid. CA: coumaric acid. FA: ferulic acid. All experiments were done in triplicates. All values shown here have been blanked against reactions containing the LPMO without any electron donors. Bars indicate means (error bars: standard deviations of three replicates). It was decided to quantify the native oligomers, instead of C1-oxidized products, because they are more stable and ensure a reliable comparison between conversion experiments, as previously reported<sup>24</sup>. (b-i) 100  $\mu$ L reactions containing 1 mg mL<sup>-1</sup> substrate, 2  $\mu$ M LPMO, 1 mM gallic acid and different amounts of commercial glycoside hydrolases (0.8 mU GH6 (b, c), 5.4 mU GH7 (d, e), 10  $\mu$ g GH9 (f, g) and 4 mU GH1 (h, i)) were carried out at 28 °C for 3 hours at 600 rpm. Oligosaccharides were quantified by HPAEC. The LPMO boosted the activity of all GHs tested, and the synergy was further enhanced upon addition of gallic acid. The main products released were cellobiose (GH6, GH7), cellotetraose (GH9) and glucose (GH1). The chromatograms of all boosting experiments are staggered in order to avoid overlapping of the same peak from different samples. Bars indicate means (error bars: standard deviations of three replicates). Two different HPAEC methods were used for b-g (“oligosaccharide method”) and h-i (“monosaccharide method”), respectively (see Methods for more details). We routinely experienced a slight shift of the retention time for the same peak (for example, cellobiose) between different sample batches (b, d and f) which, however, did not interfere with the analysis. The identity and concentration of the products was determined by analysis of commercial standards.

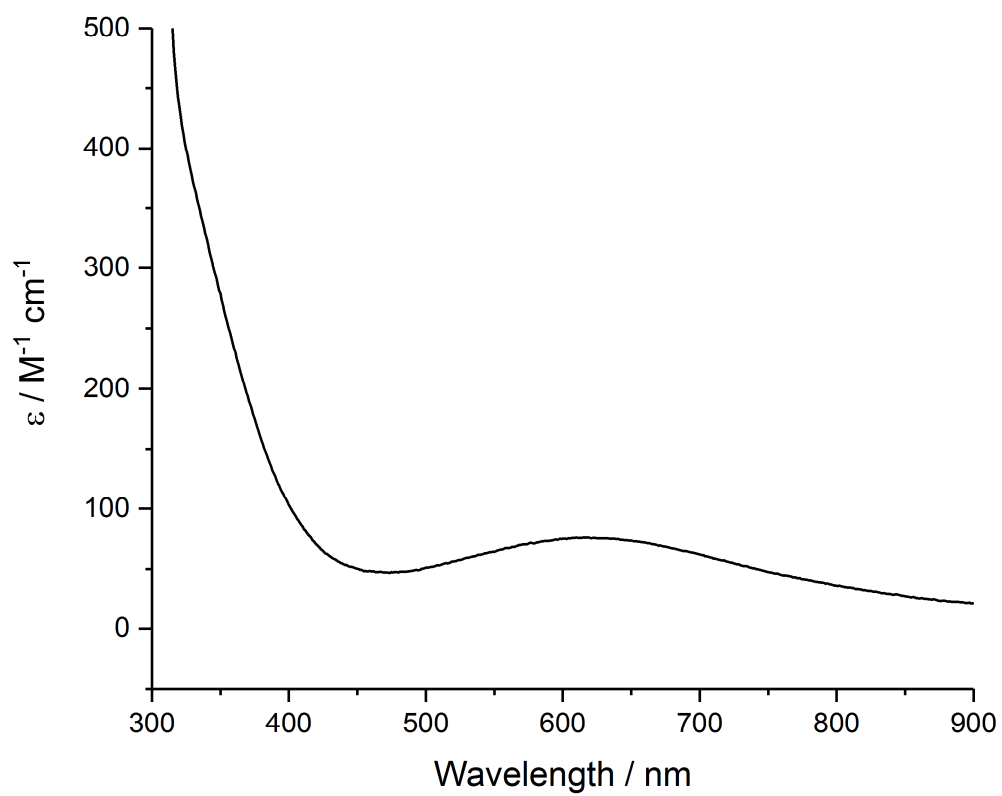

**Supplementary Figure 9 | UV/vis spectrum of *TdAA15A*.** Spectrum was collected with 1 mM protein in 20 mM sodium phosphate buffer pH 7.

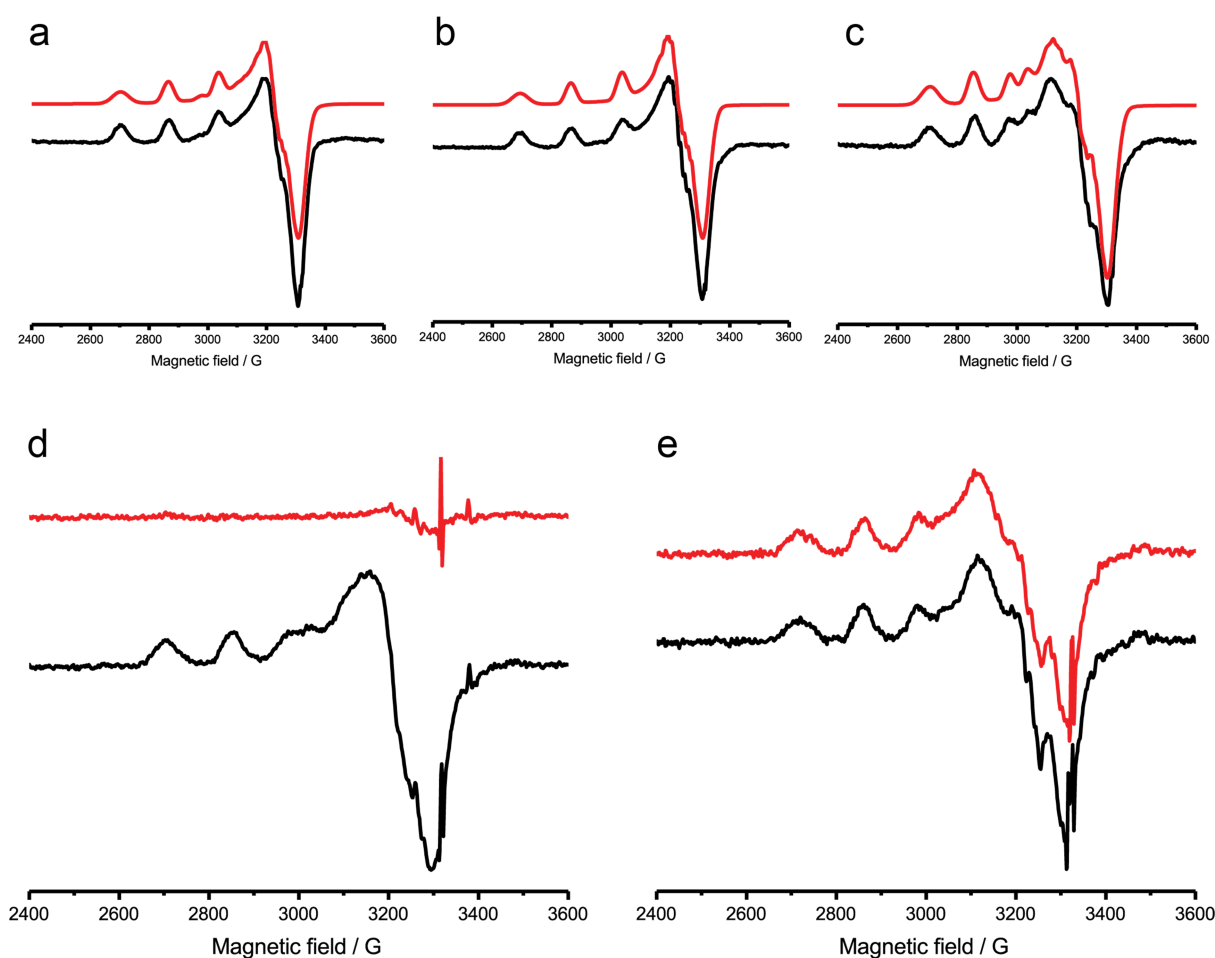

**Supplementary Figure 10 | Continuous wave X-band EPR spectra (9.3 GHz, 160 K) of *TdAA15A*.** EPR spectra of 0.3 mM *TdAA15A* in a mixed buffer composed by sodium acetate, MES, HEPES and TRIS (10 mM each) at pH 6 (**a**), pH 8.5 (**b**) or pH 6 with 10% glycerol added (**c**), with simulations shown in red. Simulations were obtained with 85% of species 1 and 15% of species 2 in (**a**), 100% of species 1 in (**b**) and 45% of species 1 and 55% of species 2 in (**c**). See Supplementary Table 3 for details of spin Hamiltonian parameters. (**d**) EPR spectrum of 0.2 mM *TdAA15A* in 20 mM sodium phosphate buffer pH 6 recorded before (black) or 10 min after addition of 100 equivalents of the reductant sodium ascorbate (red). (**e**) EPR spectrum of 0.2 mM *TdAA15A* in 20 mM sodium phosphate buffer pH 6 with 10% glycerol recorded before (black) or 10 min after addition of 20 equivalents of the oxidant potassium ferricyanide (red). The signal at ~3320 G in (**d**) and (**e**) is due to the EPR tube.

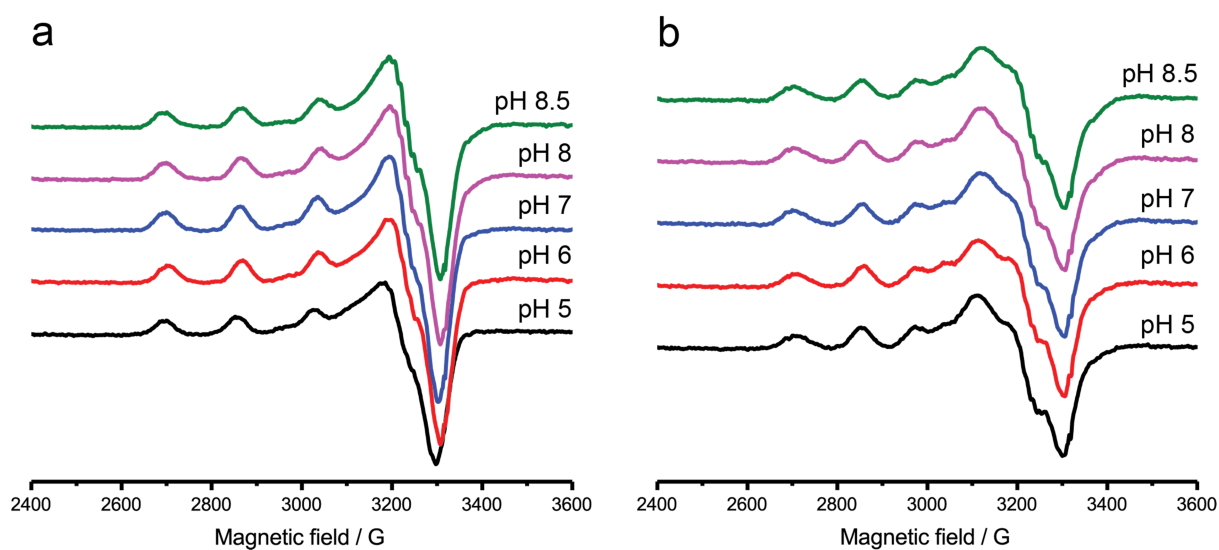

**Supplementary Figure 11 | Continuous wave X-band EPR pH titration spectra (9.3 GHz, 160 K) of *TdAA15A*.** EPR spectra of 0.3 mM *TdAA15A* in a mixed buffer composed by sodium acetate, MES, HEPES and TRIS (10 mM each) without (a) and with (b) 10% glycerol. Spectra recorded every 0.5 pH units between pH 5 and pH 8.5. For clarity, only a selection of spectra is presented; full data are available through Research Data York (DOI: 10.15124/bd09e86b-9d92-4802-9337-18b138e7abb7).



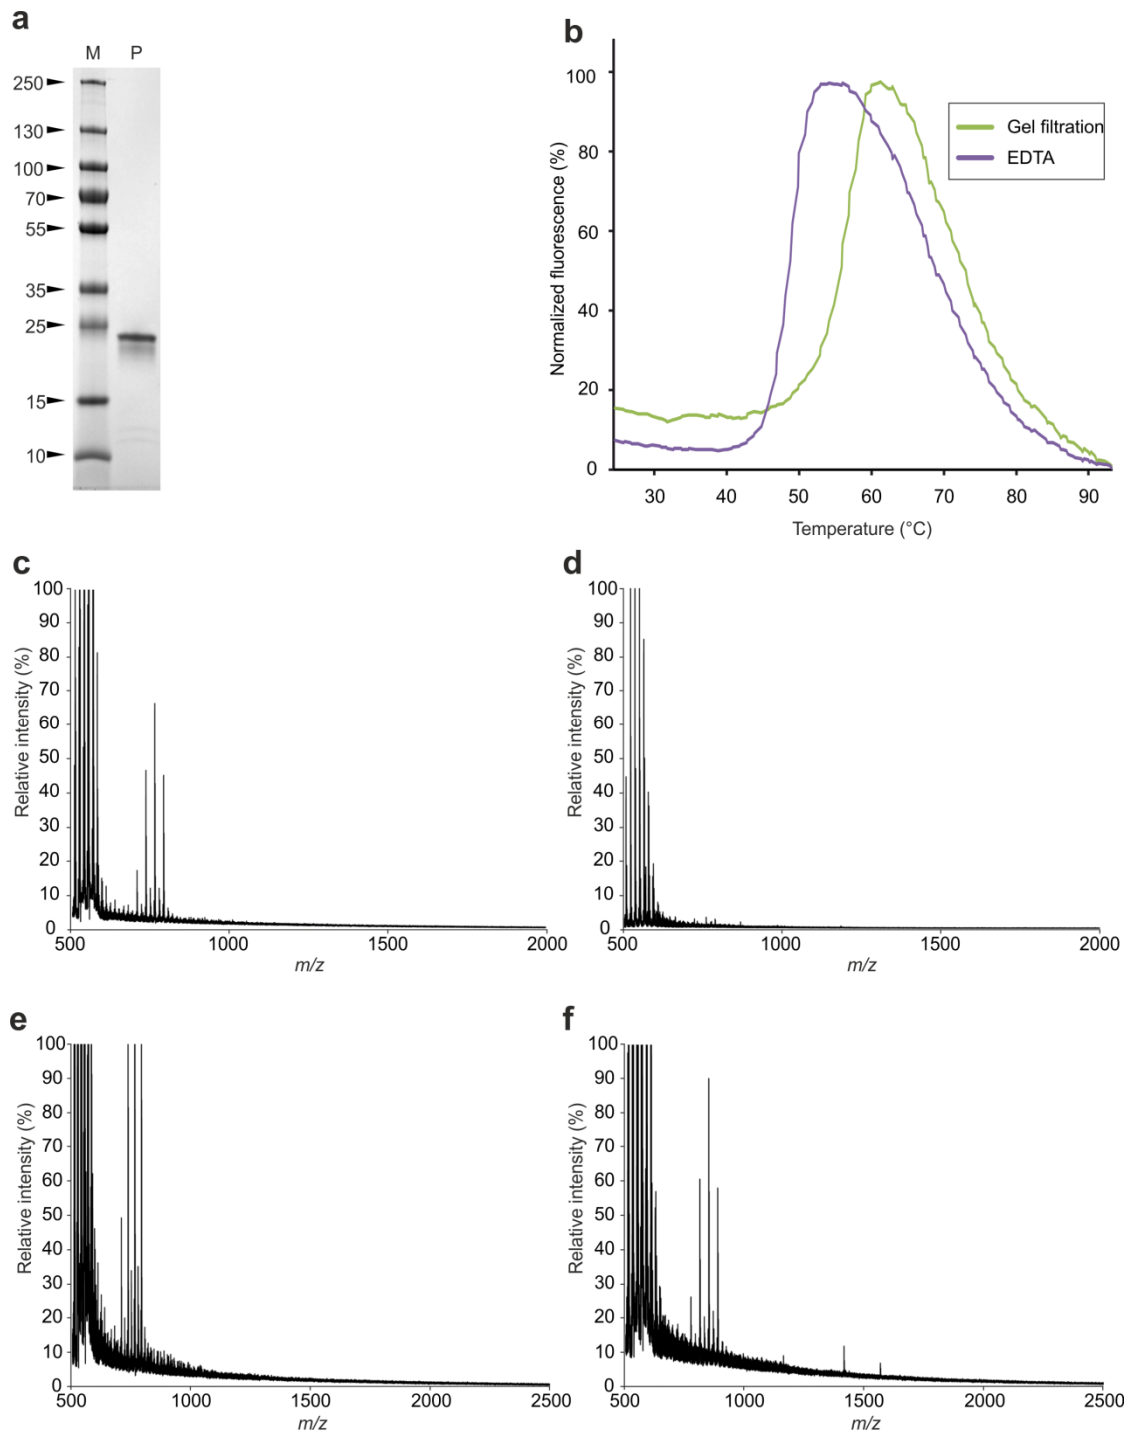

**Supplementary Figure 12 | Purification of recombinant *TdAA15B* and negative control activity assays with chitin.**

(a) SDS-PAGE analysis of *TdAA15B* after purification with a 5 mL strep-tag affinity chromatography column followed by size-exclusion chromatography. P: protein. M: protein marker. Numbers on the left indicate the molecular weight in kDa. (b) Melting curves Cu-loaded *TdAA15B* after size-exclusion chromatography (“Gel filtration”,  $T_m$  56.7 °C) and after de-metallation with 10 mM EDTA (“EDTA”,  $T_m$  49.2 °C). (c-f) MALDI-TOF MS analysis of *in vitro* negative control activity assays with purified *TdAA15B*, under the same

conditions as in Fig. 5 b, c. The panels show spectra of products obtained after incubation of 4 mg mL<sup>-1</sup>  $\alpha$ -chitin (**c, d**) or  $\beta$ -chitin (**e, f**), either with 4 mM gallic acid (**c, e**) or 2  $\mu$ M *TdAA15B* (**d, f**) alone. The spectra do not show detectable amounts of native or oxidized cello-oligosaccharides. In **c-d** and **e-f**, 100% relative intensity represents  $2.9 \times 10^4$  and  $1.3 \times 10^4$  arbitrary units (a.u.), respectively.

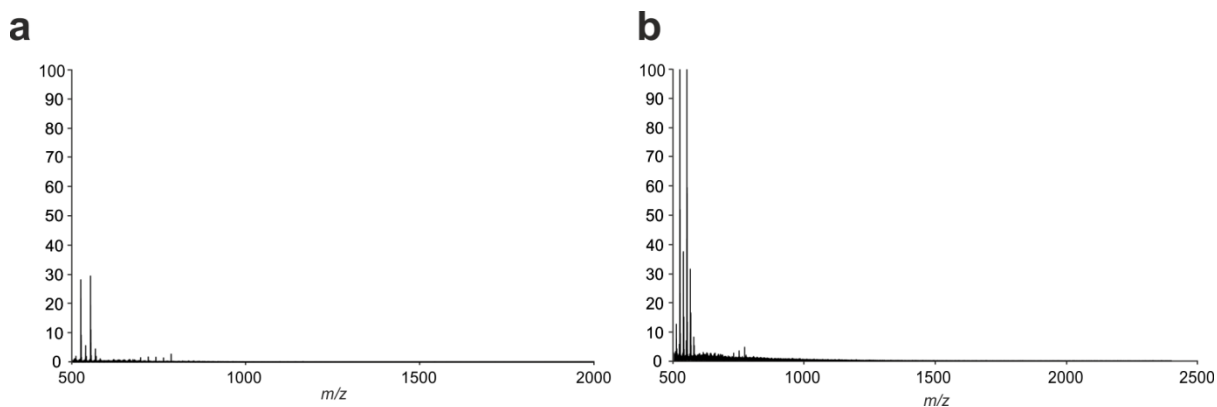

**Supplementary Figure 13 | MALDI-TOF MS of activity assays with *TdAA15B* in the presence of EDTA.**

MALDI-TOF MS analysis of *in vitro* negative control activity assays with purified *TdAA15B*, under the same experimental conditions as in Figure 5b, c. The panels show spectra of products obtained after incubation of 4 mg mL<sup>-1</sup> α-chitin (**a**) and β-chitin (**b**) with 2 μM *TdAA15B*, 4 mM gallic acid and 10 mM EDTA. The spectra do not show detectable amounts of native or oxidized cello-oligosaccharides. In **a** and **b**, 100% relative intensity represents 2.9 × 10<sup>4</sup> and 1.3 × 10<sup>4</sup> arbitrary units (a.u.), respectively.

**Supplementary Table 1 | Gene expression analysis of LPMO sequences in *T. domestica*.**

| <b>Contig</b>                   | <b>Number of mapped reads</b> | <b>TPM</b> |
|---------------------------------|-------------------------------|------------|
| GASN01405718.1 = <i>TdAA15A</i> | 49220                         | 2040       |
| GASN01030700.1                  | 41936                         | 1363       |
| GASN01405900.1                  | 19092                         | 777        |
| GASN02043256.1                  | 20908                         | 839        |
| GASN01018175.1                  | 19326                         | 657        |
| GASN01000262.1                  | 11244                         | 415        |
| GASN01407914.1                  | 10437                         | 345        |
| GASN01404332.1                  | 5175                          | 243        |
| GASN01000264.1                  | 2942                          | 145        |
| GASN01024742.1                  | 2475                          | 129        |
| GASN01028566.1                  | 1285                          | 78         |
| GASN01400743.1                  | 1198                          | 73         |
| GASN01404421.1                  | 1491                          | 69         |
| GASN01009794.1                  | 1149                          | 66         |
| GASN01404396.1                  | 728                           | 34         |
| GASN01028018.1                  | 410                           | 22         |
| GASN01011237.1                  | 552                           | 22         |
| GASN01028062.1                  | 300                           | 18         |
| GASN01024272.1                  | 303                           | 13         |
| GASN01405771.1                  | 136                           | 6          |
| GASN01404868.1                  | 74                            | 3          |
| GASN01010363.1 = <i>TdAA15B</i> | 74                            | 1          |
| GASN01008505.1                  | 41                            | 1          |

Raw reads were retrieved from NCBI (accession: SRR921648) and mapped onto the published transcriptome of *Thermobia* to determine normalized expression values (TPM = Transcripts Per kilobase Million) using Salmon (part of the Galaxy toolshed)<sup>53</sup>.

Supplementary Table 2 | Data collection, phasing and refinement statistics of *TdAA15A*.

|                                                     | Cu <sup>2+</sup> SAD - BLEND    | Cu(I) (5MSZ)                    |
|-----------------------------------------------------|---------------------------------|---------------------------------|
| <b>Data collection</b>                              |                                 |                                 |
| Space group                                         | P22 <sub>1</sub> 2 <sub>1</sub> | P22 <sub>1</sub> 2 <sub>1</sub> |
| Cell dimensions                                     |                                 |                                 |
| <i>a</i> , <i>b</i> , <i>c</i> (Å)                  | 47.0, 56.9, 66.9                | 47.0, 56.9, 66.7                |
| $\alpha$ , $\beta$ , $\gamma$ (°)                   | 90.0                            | 90.0                            |
| Wavelength (Å)                                      | 0.966                           | 0.966                           |
| Resolution (Å)                                      | 66.87–2.00 (2.05–2.00)          | 56.87–1.10 (1.12–1.10)          |
| <i>R</i> <sub>merge</sub>                           | 0.12 (0.15)                     | 0.07 (0.66)                     |
| <i>I</i> / $\sigma$ <i>I</i>                        | 44.3 (31.8)                     | 8.0 (1.6)                       |
| Completeness (%)                                    | 100.0 (100.0)                   | 99.6 (99.9)                     |
| Redundancy                                          | 54.1 (57.0)                     | 3.8 (3.8)                       |
| Half-set correlation CC(1/2)                        | 0.998 (0.998)                   | 0.996 (0.637)                   |
| <i>R</i> <sub>p.i.m.</sub>                          | 0.022 (0.028)                   | 0.054 (0.580)                   |
| <b>Refinement</b>                                   |                                 |                                 |
| Resolution (Å)                                      |                                 | 56.87–1.10                      |
| No. reflections (Work/Free)                         |                                 | 72,815/3694                     |
| <i>R</i> <sub>work</sub> / <i>R</i> <sub>free</sub> |                                 | 0.13/0.15                       |
| No. atoms                                           |                                 |                                 |
| Protein                                             |                                 | 2,967                           |
| Ligand/ion                                          |                                 | 19                              |
| Water                                               |                                 | 209                             |
| <i>B</i> -factors (Å <sup>2</sup> )                 |                                 |                                 |
| Protein                                             |                                 | 15                              |
| Ligand/ion                                          |                                 | 35                              |
| Water                                               |                                 | 25                              |
| R.m.s deviations                                    |                                 |                                 |
| Bond lengths (Å)                                    |                                 | 0.012                           |
| Bond angles (°)                                     |                                 | 1.55                            |

**Supplementary Table 3 | EPR analysis of *TdAA15A***

|                                     |       | <b>Species 1</b> | <b>Species 2</b> |
|-------------------------------------|-------|------------------|------------------|
| <b>g values</b>                     | $g_x$ | 2.044            | 2.017            |
|                                     | $g_y$ | 2.071            | 2.115            |
|                                     | $g_z$ | 2.254            | 2.283            |
| <b>A<sub>Cu</sub> (MHz)</b>         | $A_x$ | 47               | 15               |
|                                     | $A_y$ | 60               | 65               |
|                                     | $A_z$ | 525              | 407              |
| <b>SHF A<sub>N</sub> (MHz)</b>      |       | 18, 31, 37       | 30-40            |
| <b>A<sub>Cu</sub> strains (MHz)</b> |       | 57, 65, 100      | 70, 75, 100      |
| <b>Line widths</b>                  |       | 0.3, 0.3         | 0.3, 0.3         |

EPR spin Hamiltonian parameters from simulations of cw X band spectra for *TdAA15A*. The EPR parameters were derived by simultaneous fitting of the spectra at pH 6, pH 8.5 and pH 6 in the presence of 10% glycerol obtained during the EPR pH titrations (Supplementary Figure 10). Parallel values are determined accurately. Accurate determination of perpendicular values and superhyperfine coupling constants was not possible due to second order nature of the spectrum in this region.

**Supplementary Table 4 | List of chitin-related genes co-expressed with *TdAA15A* in *Drosophila* across developmental stages (from embryo to adult).**

| Gene    | Correlation (%) | Main molecular function                                               | Main biological processes                           |
|---------|-----------------|-----------------------------------------------------------------------|-----------------------------------------------------|
| Cpr65Ec | 88.65           | structural constituent of chitin-based larval cuticle                 | chitin-based cuticle development                    |
| Edg78E  | 84.13           | structural constituent of chitin-based larval cuticle                 | chitin-based cuticle development                    |
| CG13676 | 83.51           | chitin binding                                                        | chitin metabolic process                            |
| Cpr51A  | 82.59           | structural constituent of chitin-based larval cuticle                 | chitin-based cuticle development                    |
| reb     | 82.02           | unknown                                                               | chitin biosynthetic process                         |
| tfc     | 81.77           | carbohydrate binding                                                  | adult chitin-containing cuticle pigmentation        |
| Cpr49Ag | 80.69           | structural constituent of chitin-based larval cuticle                 | chitin-based cuticle development                    |
| Edg91   | 80.26           | structural constituent of pupal chitin-based cuticle                  | chitin-based cuticle development                    |
| CG8927  | 79.65           | structural constituent of cuticle                                     | chitin-based cuticle development                    |
| TwdIE   | 78.76           | structural constituent of chitin-based cuticle                        | chitin-based cuticle development                    |
| obst-B  | 78.37           | chitin binding                                                        | chitin metabolic process                            |
| pot     | 78.02           | molecular_function                                                    | chitin-based embryonic cuticle biosynthetic process |
| CG10359 | 77.42           | G-protein coupled receptor binding                                    | G-protein coupled receptor signaling pathway        |
|         |                 | chitin binding                                                        |                                                     |
| Cht6    | 77.23           | chitinase activity                                                    | chitin catabolic process                            |
| kkv     | 76.92           | chitin synthase activity                                              | chitin biosynthetic process                         |
|         |                 |                                                                       | trachea morphogenesis                               |
| pio     | 76.64           | molecular_function                                                    | chitin-based embryonic cuticle biosynthetic process |
|         |                 |                                                                       | open tracheal system development                    |
| obst-A  | 76.48           | chitin binding                                                        | chitin metabolic process                            |
|         |                 |                                                                       | regulation of tube size, open tracheal system       |
| Cda4    | 75.99           | hydrolase activity, acting on carbon-nitrogen (but not peptide) bonds | chitin metabolic process                            |
| Gfat1   | 75.78           | glutamine-fructose-6-phosphate transaminase (isomerizing) activity    | carbohydrate derivative biosynthetic process        |
| Cht5    | 75.44           | chitinase activity                                                    | chitin catabolic process                            |
| Lcp65Ad | 75.36           | structural constituent of chitin-based larval cuticle                 | chitin-based cuticle development                    |
| Cpr64Ad | 75.06           | structural constituent of chitin-based larval cuticle                 | chitin-based cuticle development                    |
| Cpr97Ea | 74.10           | structural constituent of chitin-based larval cuticle                 | chitin-based cuticle development                    |
|         |                 | structural constituent of cuticle                                     |                                                     |
| knk     | 73.16           | unknown                                                               | chitin biosynthetic process                         |
|         |                 |                                                                       | trachea morphogenesis                               |
| Cpr56F  | 72.98           | structural constituent of chitin-based larval cuticle                 | chitin-based cuticle development                    |
| Cht7    | 71.43           | chitinase activity                                                    | chitin catabolic process                            |

The table shows the chitin-related genes found among the top 100 sequences with the highest expression correlation with *TdAA15A* during embryogenesis, larval stage, pupal stage and adult stage. modENCODE developmental RNA-Seq data were retrieved from FlyBase using the RNA-Seq Expression Similarity Search tool.

**Supplementary Table 5 | Phenotypes of *T. castaneum* induced by RNAi knockdown of AA15 coding genes (Data: iBeetle).**

| Gene target of RNAi | Phenotype for "Metamorphosis and survival"                                                                            |
|---------------------|-----------------------------------------------------------------------------------------------------------------------|
| TC016344            | Lethalities 11 days after larval injection: 40.0% (includes death as larva, prepupa, pupa)                            |
|                     | Lethalities 22 days after larval injection: 40.0% (includes death as larva, prepupa, pupa, adult)                     |
| TC016345            | Lethality 11 days after pupal injection: 70.0% (includes death as pupa, adult)                                        |
| TC016348            | Lethality 11 days after pupal injection: 60.0% (includes death as pupa, adult)                                        |
| TC016349            | Thorax not present                                                                                                    |
|                     | Abdomen not present                                                                                                   |
|                     | Percentage of animals affected/eggs on slide: more than 80%                                                           |
| TC016350            | Lethality 11 days after pupal injection: 30.0% (includes death as pupa, adult)                                        |
|                     | Embryo/egg without visible larval cuticle in cuticle preparation - percentage of animals/eggs on slide: more than 80% |
| TC002263            | Embryo/egg without visible larval cuticle in cuticle preparation - percentage of animals/eggs on slide: more than 80% |



**Supplementary Table 6 | List of oligonucleotide primers.**

| Oligonucleotide name   | Oligonucleotide sequence                              |
|------------------------|-------------------------------------------------------|
| GASN01405718.1_F       | TGGTAAAGTTATCGCAGCAGATC                               |
| GASN01405718.1_R       | AAGGAGGAAGTAGCTGCCTAC                                 |
| GASN01404332.1_F       | TTCACAATGGCTCGTGTAGC                                  |
| GASN01404332.1_R       | TCGTTGAAAATGTGTGAGATACCTG                             |
| GASN01404396.1_F       | AGCAAGTAAAAGAACTAAA                                   |
| GASN01404396.1_R       | AGTAGTTGTGTCTTCTTTACTGTCCTG                           |
| GASN01405718.1_InFus_F | CAGCCGGCGATGGCCCATGGACACTTGTCCGTTCC                   |
| GASN01405718.1_Strep_R | CTTTTCGAACTGCGGGTGGCTCCAAGCGATAGCAATATC<br>AGCACAATTC |
| GASN01010363.1_InFus_F | CAGCCGGCGATGGCCCATGGATATCTGGTAGATCCGC                 |
| GASN01010363.1_Strep_R | CTTTTCGAACTGCGGGTGGCTCCAGGCAATGCTTATATC<br>AGCACAATTC |
| Strep_R_InFus          | AGCAGCCGGATCTCACTTTTCGAACTGCGGGTG                     |

## Supplementary Notes

### Supplementary Note 1

**Full gene coding sequence (corresponding to contig GASN01030700.1) from start to stop codon, amplified from genomic DNA of *T. domestica* (exons are underlined).**

ATGGCTCGTCTAATCTTGGCAATCAGCGCTCTCCTCTTGGCCCACCAAGTTGC  
AGGCCATGGTCACTTGCACGACCTCCTTCCAGAACTCCGCTTGGCATCTG  
GGATTCAATGTTCTCCTACCTACAACGAGGATGGACTTAACTGTGGTGGCT  
ATGGAGTGAGTAACACCTTAATATGTTTAAAATCAGCATATTCTTGATCCATC  
CTTTTATTAAATCTTTGCAAAGACCCTGAACTATAGGACTTTTCATGTTCAAC  
GGTGGGAAGTAGCAGTAAAATAGTAAGTTTGTTAAGTTTGTTTCGTAATGTTT  
CCAATAAAACAGAGCACGAATTTCTTTGGAAGAAAGGATGGAAAATAATAA  
AAAGAAAATAGGAACTAAAGAATTAAGCAAGAAGTAGAAAAGAAATTGGT  
AGTTAGGCATATTCGTACATACGTTTCGTATCTTAATTTTTTACATCGATAATTC  
GAGGAATCTTCATTGGTATATTTAGACGTAATATTTAAAAGAATTACTAAAAT  
TTTGTAACGGTAGAAAATTATTCAAAGAGGTTTGTACGTAGTAGTGGAGATG  
TAGATAAGAAAATGCCATCGTGGTAATGGAAATGCAAGTAAACGAATTTAGT  
TTGCATTATAGAGATGAAAGCAGGAGAAATCTTCGTTTACCAATTTCTTTAAC  
TTAACACGTAGACTACCATGTGTATGAAATTCTAAACACATGGCTCCCCCGT  
ACAGCGCCGTGTGTATGATTTTCCATACACAAACAATATATTGCACTTTTGTC  
GCGTTCGTTCTATAGGTTTGTATGCAATTACATACATATGGCGAATAAGTCAA  
AATTTAATGTCCAAGCCACGTATGTACAAAACCATACAGAAAGAAAATTAAC  
ATTTCTGCGGCTAAAACAAAGATGGCGGCCCGTGGCACACAGGCGATAACG  
ATCAACAGATATAGTGGCAGCCAAAGTGTTAAAAAAAATAAATGTGTGAAA  
TAAAGTAATCACATTTAAACATAAAAATTCTAACTATCAGAAGACCCCTGAA  
ATATCTCATTAATTATAAATTACCTTGAGCTGTGGTATATTTTTTTAAAAAAA  
ATATTTTTACATCATATTTTATTTTCGAGTACACAACAGTTAAATACCAGGGT  
GTTTTCCATTTGCACAAGGTCCTGTTAATATAGGTTTAGTTATTGTCCTTG  
ACACATCACAAACATAGATATCCTATTAGGGAAAGCATCCAGTCAGCATTAT  
ACGTACTIONGACTAATGATAAAGTGTTAACAGAATTTGGGGGAAAAGAAGAA  
CTATATAAAGTCAATTTAGAAGAAATTGTCATATTAGGGTTGTGATAAAAATA

ATAGAAGGTGACTGAGGGAAAGAGAGAAGATTGTACTTGATGCAGGGTATG  
AAAGAGGGTAATTCGTAACCTCAGAACTAAGAGATTAGATGATCAAGGAAAT  
TAGTTGGATGGATAAGATTTCAAACAAAAGTGTGATGAAAATGGTGGACTAT  
TTTGAAAAGAGGAGATAGATGATAGGCTATGTTGTGAGACATAGACAAATC  
ACGCTGTTAACAACAGAGGGGAAGCCAGATAGAACAAGAAAATTAGGAAAAC  
CAAAAATGGATCAAAAAGATTGCGATCTTGATCAATAATTAGTTTTTGAATCA  
GGGGCCACAAAATTTTCAAGCGGTTTCTAAATCAAATTTTCGTATTTTCTAAG  
GAATAAGCACATCATACTGAGTTAAGTGATAGTTTGGGTTTGGCTACACTGT  
ATGTAGTTCTCCAGATATGAGGCATGCAAGAAAATTTTCGATTGAGATACAT  
TGGATCTCTTGATCCAAAATACTTATAGGAAGCCCACTATTGAAACATACG  
GAAAATTAACACACGCTATGAGGAAAAGAATACATAGTAGGCTAAGGTA  
AGGAAGAATGGATAGATGTATCAAATCAGTCAAAGATTGCAATATATATAT  
ATATTTCTTCGGGAGAATTAAGACTATAGATTCAAACTTGCTAAAGACTAAA  
CCCTTAGCAACCATGTTTGAAGACTTCAAAGGGAGTTATTATATGACAGGGA  
TATCTTGAAAAGGGTCACGACACCAACAGCCTCATTGAGAGTTTAGGCGGAA  
TACTTTTAAACTAGTTAGCAACTAAAAGTTGTATGCAAACCTTATAATAATTT  
TTCTTTTAAATAATGGCTGCACCATAAAGGAGAACAATATTAGAGATTAGAA  
CCATCGAGAACTGTAAAAGTAGATACAGTTAAGAGAATTTAGGAGGATTA  
GTCATATGTCTTATATTACGAAGGATCGGCACTATGCATAATGGAACGCGTG  
GCTGGAACAGTTATGCATTAATTGAGAAACGCACTCATTCTGATTATCGCTC  
ATTCTCCCCAAAACCTCTCTATTAGGAGTGTTGTTTTCTGTTTTTCTTAATAGG  
ACAAAATCTACTAAGCACGTTTTACTAAATGAAAACCTTCGTTTTTCTTTTCAG  
GCAAGTGGTGGCAAATGTGGAGAATGTGGAGATCCTTATGCTGATCCTCGTC  
CCCGTGCTCACGAAAATGGTGGCCAATTCGGCACTGGCGTCATCGTCAAGGA  
GTACATAGAGGGTCAAACCTTCACCGCAACTGTGAACTGGTCCACCACTCAT  
TTGGGATACAACGAGTTCCGTCTGTGCCCACTCAAGAGTGACACTGAACTCG  
AGACCCAAGAGTGCTTCGACCAATATCTTCTGGAATTGGCTGATGGCTCTGG  
AACCCGCTACATGCTGCAGGAAAACATCGTTCCTGTCGTTCAACATCGAG  
CTCAAACCTCCAGCTGGTGTCAAATGTGAACACTGTGTCCTCCAATGGTACTG  
GAAGGCCGGTATGTGTATTTTTAGTATTTTTTCATCATCATGCATTGAACTTT  
AATACTGAAATGAGTCATATTTATCGTAATATTTTAAATATCGTACTATCTCG  
TTTCAACATTATTACTAGACTTCCAAACTAAGCTATGCATACGAGGGAGTCTC  
GTAAGTGTGCGAAGTCTTATAGAACGGGTTGTCTGTCTGTCGACAGGTGTCA  
CAGCGAAAACAGTAAGATATATATCGAGATGTGCTTTTTTGGCAATTGATTCA

GCGTTCCAAAGTTAGGTTCCGTCTTCTACCATAACTCTCTATTCAAACCGTAC  
GTGGTTCAAATTAGTCATATCCGGTTTCGTGCGATTATCGCCTTAGAACGTAGG  
TAACAGTTAGTAAGAAGCATTTTTTTTTTGTTTTGCAAACAATTCAGCGTCCCA  
AGATAACATATCACGACTATTCACAACACTGTCAAAATCAGAAGTGGCACGA  
ATTTGTTGTTACATCCGGTTTCAATACTGATTTTCAGTAGAGCAAAAACGGTAA  
ATGCTTTCAAGATGCAGTTTTCTCAAATCGATTCAGTGTTCCAAGAATAGTAT  
TCACCTCCTCCCTTGGTAATCTATTCAAACAGAAAGTAGGTGAAACAAATGA  
TTTTTGGTTTCAACCTTTATCACCATTGAACAAAACCAATAAGAGATTGAGA  
GTAATGGCTTTTTGTTTTAGATTCAGATTTTCGAGGGACAAGTTCTATCCTTGA  
TTTTATTACTCCGTTGCAACCAGTACTTATAGATGCACTACTTCAAATTAGAG  
TATTGAATTCTCATAGTTTGGAAAGTCTTAGTGTCACACTGTGAAACGATACTC  
ATTATTATTATGACAGAGACGTAAGCAAGGGTAGGTCATGATGGGTCTGGA  
TTCCCCGAAATCCATACTTTTCTGTAAATTTAGTCTAATTTTTAGAGGTGAT  
TTTACAAATTTAATATAGTTTATCATCATATTGAATTTGAACTCCCCTCAA  
AGCTTTGGGCTCACCCAGAAATAAATTTCTGCATATGTGCCTGATAATTATTA  
TTAACGTACAGAGAACTTTTGTGTACTTTCTAGGTCAGTTTGAAATGAAAGA  
GATAGACATGTTTTTTGAGATACTATTTTGAGACATGAACGAAAATGGACA  
TGTTTTTTGAGATACTATTTTCTGATAAAGAAAGGAATGAATTGTAAGAATTA  
ACCAGTATATAATATTTATCTAATAATATAATATATTTGATTACAGGTAACAA  
CGTAGGCCAATGTGCTGATGGAAGCTACCAAATTGGATGCGGCACACAAGA  
AACCTACAGTAACTGTGCTGATATCAGAATCAACTAA

## Supplementary Note 2

**List of non-redundant full length LPMO sequences from catalytic N-terminal histidine to the C-terminus, identified in the published transcriptome of *T. domestica*. The predicted protein sequences are named with the original contig identifier.**

>GASN01405718.1

HGHLSVPPMRSSMWRDGYNVPPNYNDDGLNCGSFDVQWVKNGGKCGECGDD  
YSLPRPRPNESGGMYGKNIIVANYQQGSTISVDLHIQAPHIGFFEFRLCARNDPNV  
LETQDCFDQHLLLELADGSGTRFTMEEHVAGEYTVDLKLPQGVCTNCVQLQWFW  
RTGNRYGDCGDGTSGMGCGPQEEYRNCADIAIA

>GASN01404332.1

HGYMSNPPERSSAWRFGYDIPPNYNDNGLNCGGMGAQWDQNGGKCGVCGDD  
YSLPRPRPNESGGTYGKGIIVGEYKAGQTISTTLTIVAPHIGWFEFRICARNDPNTL  
EEQECFDQHLLLELADGSGTRFTMTEHVAGDYVVDLKLPEGLTCTNCVQLQWYW  
RTGNRWGDCGDGTSGMGCGPQEEYRNCADISIS

>GASN01404421.1

HGHMADPPMRSSMWRYGFNTPPNYNDEGLNCGSFDVQWNQNNGMCGECGDD  
YALSRPRPNESGGQYGTGIIVREYKAGSEVPILITIVAPHTGTFFFRVCPRNDPNV  
LETQDCFDQHLLQLADGSGTQYYMPEHIAGNYTVNVKLPEGLTCTNCVQLQWY  
WRASNRWGPCNGTSAAGGCGPQETYRNCADVSI

>GASN01011237.1

HGFMSEPPQRSSMWRSGFNTPPNYTDGSLNCGGFDVQWQQNDGKCGLCGDDY  
ALAQPRPNESGGTYGTGVVGRITYKSGEVIEVSVNISASHVGVFEFHLRNDPT  
VMETEECFSQHILELADGSGTRYTLDNYNISGIRTVELQLPAGVTCTNCVFRWHW  
QCGNRYGPCGDGTSAMGCGIQETYRNCADVAIE

>GASN01407914.1

HGHLADPPMRSSMWRVGFNTPPNYDDDGLNCGGFGVQWDQNNGLCGECGDN  
YALPRPRPNEAGGKYGNIGIIVRNYKAGEVIQVQLNFSTNHGGFSEFRPCPVNDP

KKLSTQECFDQHILLELADGSGTRYNHDEHQYPYVFGVKLPDGLTCTQCVFQWY  
WKAGNRWGNCDGTQGMGCGQQETYNRCADVSIA

>GASN01018175.1

HGFMSEPPERSSMWRAGFNVPNNYVDTGLNCGGYDVQWQQNGGKCGLCGDD  
FALPQPRPNESGGTYGTGVIGRTYKSGEVIQVGVNISASHIGWFEFHLNERNDPN  
VMETEECFAQHVLQLADGSGTRYPLSDYSPGIRNIELQLPAGVTCSNCILRWHW  
ECGNRYGPCGDGTSAMGCGIQETYNRCADVAIE

>GASN01028018.1

HGYMSDPPMRSSMWRFGFNVPNNYNDNGLNCGGFGSNGGKCGVCGDPYNLAR  
PRPNENGGKYGLGIIAKEYKEGQVVPVTLTIIANHVGYEYFRVCPLSQPNQLEEQ  
SCFDQHILLELADGSGTKFHVPDSSGSEYTVEVKLPEGLTCDHCVLQWYWRGT  
FYGQCDDGTWAVGCGPQEIYYNCADISIS

>GASN01028062.1

HGYLIDPPQRSSMWRGLGYDVPPNYYDMGLNCGSFPVMMANGGKCGICGDAYN  
ITRPRPNETGGQYATGIIAAEYKQGQTISITIHMGANHKGWYEWRLCARNDPNQ  
LEEQSCFDQHILLELADGSGTRYNQNDGTGNKEFVYELKLPAGVTCSHCVLQWY  
WKAASYWGDCGDGTEGMGCGDQEIYINCADVSIS

>GASN01000264.1

HGFLSEPPERSSMWRFGFNVPNNYLDNALNCGSYGVQWYQNNGNCGICGDNY  
ADPRPRPNENGGTYGLGIVGREYQEGQVQVAINFTATHAGWMEWRICKLSDP  
KELEEQECFDQNILLELADGSGTRYFLDQNDNNNHGVYTTIDVRLPEGLTCDRCV  
MQWYYRDGNRWGDCGNGSSAMGCGPQEEYRNCADIAIV

>GASN01028566.1

HGYMTDPAGRSTMWRFGFNVPNNYNDNGLNCGGFGVFMNTGGKCGICGDAY  
NLPRPRPNESGGKYATGIIAREYKQGETIPVTLYMAANHKGWYEWRLCARNDP  
YQLEEQECFDQHILLELADGSGTRYIQNDGTGNTNYTIQVQLPQGVTCSHCVLQ  
WYWKAASYWGDCGDGTQGMGCGDQEVYINCADISIS

>GASN01400743.1

HGFMADPPMRSSMWRFNFNTPPNYADNELNCGGVGTQWAENGGKCGECGDP  
YQLPRPRPNDNGGTYGRGVIAKEYTVGQVIPITINMSAAHLGYFEFRLCPVNSPT  
VLETQECFDQHLLQLADGTGSKWKVPGGPGVYHIDVQLPSDLTCTQCVLQWYY  
RTGNSWGTCDGDSQGLGCGPQETYSNCADIAIA

>GASN01024742.1

HGVLQEPPMRSLLWKFGYDTPPNYNPGGLNCGGYDAQWQEFNGECGECGDPIN  
QPRPRENESGGKYGRGIIAREYTAGSTLRAVVDLYANHGGYFEFRLCPRNDPNV  
LETQDCFDKYLLETVDGSTLYWTDGSISANYTVDLKLPKGVTCSNVCVLQWYWR  
CANRYGDCNNGTWSGGCGPQETYRNCADISIL

>GASN01009794.1

HGYQISPPGRSSMWRLGYGVPPNYYDMGLNCGSFPVMMANGGKCGVCGDAY  
NITRPRPNETGGKYATGILAAEYKQGQTVPITLHMEANHKGWYEWRLCARNDP  
NQLEEQSCFDQHLLQLADGSGTRYIQNDAMGNVNYTIPVNLPPQGVTCSHCVLQ  
WYWKAASYYGDCGDGTSAVGCGDQEIYINCADISIS

>GASN01000262.1

HGYMAEPPERSSMWRFNFVPPNYYNDNGLNCGTFTGVQWQQNGGKCGVCGDN  
YALPRPRPNENGGTYGLGIIGRTYKQGQTVQVAINFTATHAGWMEWRICKLSDP  
KELEEQECFDQHLLLELAXMMDQNDNNHQGVYTIDVKLPQGLTCDRCVMQWY  
YHDGNQWGDCGNGSFGMGCGAQEEYRNCADIAIE

>GASN01404396.1

HGYMTVPPSRSSLWRFNYNSPANYNDMQLFCGGQGIQWGTNGGKCGECGDRY  
DLPRPRPNESGGKYGTGIITENYKEGQVATFTVKLTTNHGGYFEFRLCPTNDPKK  
LETQECFDQHLLLELADGSGTQFHLNRNSGEFNVDVKLPAGLTCSQCQVQWKY  
VTATTWGQCDDGTSAAAGCGPQETYQNCGDVSIE

>GASN01024272.1

HGYMEDPPARNAMWRFNYDTPVNWEDDELNCGSFGTQWDENGGKCGECGDA  
YNLARPRPNETGGKFGTGIIVQKYTEGQVISVKVKLTTSHQGYFEFRLCPTNGEL  
ETQECFDQHLLLELADGSGTRYKVPLHEDGHGELTIDLQLPQGVTCQCVLQWFY  
RAGNNWGTCDGDSGEGMGCGEQETYVNCADVSI

>GASN01405771.1

HGYMADPPQRSSMWRFGFNTPINWEDDELNCGGIGTQWDQNGGKCGECGDAY  
NLPRPRPNENGGKFGKGIIVKKNYKAGEVTTVTITLTTSHQGYFEFRLCPTNGQEE  
EQSCFDQHVLQLADGSGTKYYLPLYEGGEGDIEIDVKLPDGITCEKCVLQWFYR  
AGNNWGTCDGTEGMGCGPQETYVNCADISIS

>GASN02043256.1

HGYMSEPPQRSSMWRFGFNTPTNWNDDQLFCGGLSVQWNTNGGKCGECGDPY  
NLPRPRPNEQGGEYGKGIIVRKYQAGQLIPVTITLHTSHQGFWEFRLCPTNGALE  
TQECLDQHLLQLEDGSTQYHLP AQEGLSGEFNLNVRLPDNLTCEQCVLQWRWR  
SGNNWGTCDGTTGMGCGPQETYINCADISIS

>GASN01010363.1

HGYLVDPPNRSSLWRQGYDTPRNYNDNELFCGGYGVQWDQNDGKCGECGDP  
YQLARPRPNEAGGQYGLGIITANYTAGQVATFTALLTTNHWGYFEFRLCPTNDP  
TKLTTQECFDEYLLPLASGAGTQYHVPNHNNQFNVHVKLPEGLTCSQCQVQW  
RYVTATRWDGDCGDTSAMGCGPQEMFQNCADISIA

>GASN01405900.1

HGHMLEPPMRSSAWRFGYPIPPNYNDQGLTCGTYPQWQNDGKCGVCGDDY  
ALPQPRPNENTGTYGLGVIVREYKEGQVVPQINFTTTTHGGYFQFNICPITVPGTIE  
TDECFEQYPLELADGSGYKWKLSDMNIPGSYDLEVKLPEGLTCSQCCLRWHYN  
AGHNWGDGCGDTGGMGCGAQEQTRNCADVTIS

>GASN01030700.1

HGHLHDPPSRNSAWHLGFNVPPTYNEDGLNCGGYGASGGKCGECGDPYADPRP  
RAHENGQFGTGVIVKEYIEGQTFATVNWSTTHLGYNEFRLCPLKSDTELETQ  
ECFDQYLLELADGSGTRYMLQENIVPVVHNIELKLPAGVKCEHCVLQWYWKAG  
NNVGQCADGSYQIGCGTQETYSNCADIRIN

>GASN01404868.1

HGRLMDPPSRSSLWRFGFNTPINYDDNQLFCGGFQVQWEVNGGKCGICGDSWS  
QTPPRDNELGGKYGSGIITRKYKSGSVITTTVQVTANHKGYFEFRVCPLNDSGTD



ATQDCLNQYQLPLANSQYRYYLAPNVLGYNIPQLPPDLICPHCVFQWHWNV  
GNSWGNCNGTSAVGCQPQETFRGCGDISIY

>GASN01008505.1

HGRLMDPPARNSMWRFGFPNPVNYNDNELFCGGWAVQWQQNRGQCGVCGDP  
FHVREPRPHEAGGHYAKGIIGRHYSVGQVIDIEVELTANHWGRFELYLCPNNNP  
RQVVTQECFDYPLYVDGGNDVAFYIPYDSKKKVTFRYKVRLPPYVTCSQCVIQ  
WTYYTGNMWGTCPNGTEAVGCGRPETFRNCADVRIVTSTGAFPPLGFQIDNPFL  
LYYRDLRQPSKIQALVIRDQVCLPTQLYRRIPGMDQWCETNCLRYPPNCPSQLC  
YCPQECDAIGELEGFRFGADRYCQDECLVYGKKCPEHRCSCY

### Supplementary Note 3

**List of non-redundant full length LPMO sequences from catalytic N-terminal histidine to the C-terminus, identified in the transcriptome of *Lepisma* spp. (*de novo* assembled, see Methods for more details). The predicted protein sequences are named with the contig identifier.**

>c79265\_g1\_i1

HGYMTAPPSRSSLWRFMGDAPANYNDMELFCGGQGIQWGTNGGKCGECGDNY  
ALSRPRPNESGGQYGIGIITENYQQGQTATFSVKLTTNHGGYFEFRLCPTNDPKK  
LETQECFDQHPLELADGSGSQFHLPNRNSGNFDVQVKLPAGLTCTQCVVQWRY  
VTATTWGQCDDGSFASGCGPQETYQNCGDVSIQ

>c16949\_g1\_i1

HGHLADPPMRSSMWRVGYNTPPNYNDDGLNCGGFNVQWDQNSGLCGECGDD  
YALPRPRPNEAGGQYGNNGIIVRNYKAGEEIQVTLNFSTNHGGFSEFRLCPVNDPT  
KLSTQDCFDQNLLQLADGSGTRYNHDQHQPYPYVFGVKLPDGLTCTQCVFQWY  
WKAGNRWGDCDDGTQGMGCGQQETYRNCADVSI

>c42263\_g1\_i1\_

HGFMSEPPERSSMWRAGFNVPNYVDTGLNCGGFVQWQQNDGNCGLCGDD  
YALPQPRPNESGGTYGTGVIGREYKEGDIIQVGVNMSASHIGWFEFHLCARDGPS  
VMETEDCFYQHVLELADGSGTRWPLSDYSPGIRNIEVQLPAGVTCSNCILRWHW  
QCGNRYGPCDDGTSAMGCGIQETYRNCADVAIN

>c42263\_g1\_i2

HGFMSEPPERSSMWRAGFNVPNYVDTGLNCGGFVQWQQNDGNCGLCGDD  
YALPQPRPNESGGTYGTGVIGREYKEGDIIQVGVNMSASHIGWFEFHLCARDGPS  
VMETEDCFYQHVLELADGSGTRYPLDNYNSGIRTVELLLPAGVTCSNCVLRWH  
WECGNRFGPCDDGTSAMGCGIQETYRNCADVAIN

>c45730\_g1\_i1

HGFMADPPMRSSMWRFGFNTTPANYADNELNCGGVGTQWATNGGKCGECGDP  
YNVARPRPNDNGGTYGTGVIAKEYTVGQVVPITINMSAAHLGYFEFRVCPVNDP

KKLETQECFDQHLLLELADGSGTQWKVPSNPGVYHMEVQLPSDLKCTQCVLQW  
YYRTGNSWGTCDGGSQGLGCGPQETY SNCADIAIQ

>c46276\_g1\_i1

HGYLEVPPQRSSMWRFGYDTPKNYEDDELNCGSFGTQWDQNGGKCGECGDAY  
NLKRPRPNETGGRFGKGIIVANYTEGQVISVTVKITTSHQGFEEFRLCPTNGELET  
QDCFDQHLLLELADGSGTMYEMPYGEQGQELQIDLQLPAGVTCKQCVLQWIFY  
RAGNNWGTCDGSGSEGMGCGEQETYINCADISIS

>c46276\_g2\_i1

HGYLEVPPQRSSMWRFGYNTPRNYEDDELNCGSFGVQWDQNGGKCGECGDAY  
NLARPRPNETGGKFGKGIIVANYTEGSVISVTVKVTVSHRGYFEFRLCPTNGELE  
TQECFDQHLLLELADGSGTRYKLLKEDAHGQPQIDLQLPAGVRCEQCVLQWYY  
RAANNWGTCDGSGSEGMGCGEQESWANCADIAIL

>c46909\_g1\_i1

HGHMADPPMRSSMWRYGFSTPPNYNDEGLNCGSFDVQWGQNNGLCGECGDD  
YGLSRPRPNESGGEYGTGIIVKEYKKGSEVPILITIVAPHIGYFEFRVCPRDDPSVL  
ETQECFDQHLLQLADGSGTQYHMAEHVAGNYTATVKLPDDVTCTNCVLQWY  
WRAGNRWGDCGNGTSAGGCGPQETYRNCADVAIL

>c48540\_g1\_i1

HGYQIDPPQRSSMWRLGYEVPPNYYDMGLNCGSFPVFMANGKQCGLCGDAYN  
ITRPRPNETGGKYASGIIGKDYRQGQSVITLHMEANHKGFYEWRLCARNDPNQ  
LEEQSCFDQHLLLELADGSGTRYIQTDTGTDYTIKLPQGVTCSHCVIQWYW  
KAASYWGDCGDGTQGMGCGDQEVYINCADISIS

>c48540\_g1\_i3

HGYQIDPPQRSSMWRLGYEVPPNYYDMGLNCGSFPVFMANGKQCGLCGDAYN  
ITRPRPNETGGKYASGIIGKDYRQGQSVITLHMEANHKGFYEWRLCARNDPNQ  
WEEQSCFDQHLLPLSDGSGTRYVQNDAMGNVNYTISVDLPQGVTCSHCVLQW  
YWKAASYWGDCGDGTSAVGCGDQETYINCADISIS

>c49537\_g1\_i1

HGHLQEPASRNSAWHLGFNVPPTYNEDGLNCGGYGASGGKCGECGDAYSDPK  
PRAHENGGEFGTGIVVKEYLEGQIITATVNWSTTHLGFNEFRVCPLKSDTEVETQ  
ECFDQYLLELADGSGTRFMLEENIQPVVHEVQLKLPAGLKCDHCVFQWYWKAG  
NNVGQCADGSYQLGCGTQETYSNCADISIS

>c50425\_g1\_i1

HGAMLDPPSR SVMWQFGYETEPNYNPGGLNCGGYDAQWQDFNGECGECGDPI  
NMAPRENESGGKYGKGIVVKEYKQGSNIQVLVDLYANHGGYFEFRLCPRNDA  
SELEQQDCFDKYLLETVDGSTQYYTEARDGNFTVNLKLPQGITCSQCVLQWYW  
RCANRYGDCNNGTWSGGCGPQETYRNCADIAIQ

>c50623\_g1\_i1

HGNMLEPPMRSSAWRFGFAVPPNYNDQGLTCGTYP IQWGQNGGKCGVCGDDV  
TIAQPRPNENTGT YGLGVIVREYTVGQVVP IQINFTTTHGGYFEFYLCPITVPGTIE  
TEECFQQYPLPLADGSGYRWALADMNIPGSYNLEVQLPEGLTCSQCVL RWHYN  
AGHNWGDGCGDGT SAMGCGAQEQTRNCADV SIS

>c52749\_g1\_i1

HGHMQEPPMRSSMWRYGFNTPPNYNDDGLNCGGMSVMWEQNSGECGECGDA  
YNLARPRPNEAGGKYGN GIVVREYTVGETIPVQLNFSTTHAGYFEFRLCPTNDP  
KKLSTQDCFDQNLLEVADGGTRWTL PDNNQAGFYNLNLKLPDGVSCSFCVLQ  
WLYVAGNRWGDCGDGTSGMGCGQQET YRNCADISIS

>c56329\_g1\_i1

HGHMSAPPMRSSMWRF GYDVPPNYNDDGLNCGGYDTEW IQNNGGKCGECGDD  
YSLARPRPNESGGTYGKNIIVETYSEGATISVTLTIQAPHIGYFEFRLCQRDDPTVL  
ETQDCFDQHLL ELADGSGTRFVMEEHVAGDYTVDLKLPAGVTCKACVLQFWF  
RSGNRYGDCGDGTSAVGC GPQEEYRNCADVAIA

>c56329\_g1\_i2

HGHMSAPPMRSSMWRF GYDVPPNYNDDGLNCGGYDTEW IQNNGGKCGECGDD  
YSLARPRPNESGGTYGKNIIVETYSEGATISVTLTIQAPHIGYFEFRLCQRDDPTVL  
ETQDCFDQHLL ELADGSGTRFVMEEHVAGDYTVDLKLPAGVTCKACVLQFWF  
RSGNRYGDCGDGT SAMGCGPQEEYRNCADVAIA

>c59140\_g2\_i1

HGYLINPAQRSSMWRLGYDVPPNYYDMGLNCGTFDVFMANGRKCGLCGDAY  
NMTRPRPNETGGQYATGILAGEFKQGQTMSITLHMGANHKGFYEWRLCARNDP  
NEWEEQECFDQHLLQLADGSGTRYNQMDDTGDKDFIIDVKLPDGVTCSHCVLQ  
WYWKAGHYWGDCGDGTSGMGCGDQETYINCADISIS

>c132113\_g1\_i1

HGYMAVPPMRSSMWRFGYDTPINWEDDELNCGGIGTQWDQNGGKCGECGDA  
YNLARPRPNENGGKFGKGIIVAEYKAGEVITVTITLTTSHQGYFEFRLCPTNGEPE  
EQSCFDQHVLQLADGSGTQYHLPNEEGAEGDINIDVKLPDDITCEKCVLQWFYR  
AGNNWGDCGDGTEGMGCGPQETYENCADITIS

>c24288\_g1\_i1\_c3217\_g1\_i1

HGRLMDPPARNSMWRFGFPNPVNYNDNELFCGGWAVQWQQNRGQCGVCGDP  
YHVREPRPHEAGGHYAKGIIGRHYSVGQVIDVEIELTANHWGRFELYLCPNNNP  
RQVVTQSCFDYPLYVDGGNDVAFYIPYDSKKKVTFRYKVRLPPYVTCSQCVIQ  
WTYFTGNMWGTCPNGTEAVGCGRPETFRNCADVRIITSTGAFPLGYQLDNPFL  
LYYRDFRQPSKVQALVIRDQVCLPTQLYRRIPGMDQWCETNCLRYPPNCPSQLC  
YCPQECDAIGELEGFRFGADRYCQDECLVYGKKCPAHRRCRCY

## Supplementary Note 4

**List of non-redundant full length LPMO sequences from catalytic N-terminal histidine to the C-terminus, identified in the genome of *D. melanogaster*. The original gene annotation symbols (according to FlyBase) and the proposed new nomenclature (in brackets) are shown at the front of each protein sequence.**

>CG42749 (*DmAA15A*)

HGRLMDPPARNAMWRFGYPNPVNYNDNELFCGGYAVQWEQNKGRCGICGDA  
YHVKSPRPHEAGGQYAKGIISRYTAGQTIDVEVELTANHYGRFEMFLCPNNNP  
RQEATQQCFDRYPLLISGSREHRYLIPRDAKKKDIFRYKVRLPPYVTCTQCVLQW  
TYYTANMWGTCANGTEAVGCGKAETFRNCADVAIVSNTGGGIPPPFVNKSPY  
LLYRDYRAPADNNIFPLIVRDQKCIGAPAFRALPGIDNWCEINCLRYPPNCPED  
ACQCPQECVAIGEYAGQDGADTYCMDKCLNYESECPPDRCRCY

>CG4362 (*DmAA15B*)

HGMMLSPPSRSSRWRYDGSAPQNWNDNELFCGGLYTQSNNGGRCGLCGDNFL  
DAQPRANEIGGSIGGAGVVTRSIVAGNTITVGVKITTNHLGYFEFHLCNLDAFG  
AESEECFDQNRLRFIDGSDRDKDIGDQMGEFDVTVVLPEGLTCSHCVLRWTYVGA  
NNWGICDNSGNALGCGPQETFKNCADVSIYWGRNLVKELVGGGDPVAPVEV  
A

>CG4367 (*DmAA15C*)

HGMMLSPTGRSSRWRYDNSAPTNYDDNALYCGGFWKQTENDGKCGLCGDDW  
SLEQPRPNELGGKYGSGVIVKSFAGVDEAEINVKITANHLGYFRFHICDLDENGS  
ESED CFN QYPLNFTDGSQKYINTTTGDIPVTVKLPSDLNCIHCVLRWTYTAGNN  
WGV CEDGTGAMGCGA QETFINCADISVLSSARSIIQEV PVEVAESK

>CG42598 (*DmAA15D*)

HGRLVEPPGRASAWRFGFQTPPDYNDHELNCGGLSRQWQRNGGKCGECGDAW  
DLPEPRPHEYGGHWGKGQIVRSYLPQSMTIRVELTASHMGYFEFRICPNPNAK  
QSCLDENVLSILNGSPSQPNESDLDRFYPRNGSCIYEILAQLPDFTCEHCVLQWR  
YVAGNNWGMCGNGIGAIGCGPQEEFRSCSDIALTTEYLHPYLSPINPPPSQSNGM

SANTKHNTVNIQSYKLYICILLILLILVCVVVMSIKFHNHNSFCIPQFCNNQKK  
YLFWNSSQHNNFICDLFKKNITLSNDKLDDPVHKLGD

>CG41284 (*DmAA15E*)

HGRLVEPPGRASAWRFGFQTPPDYNDHELNCGGLSRQWQRYGGKCGECGDAW  
DLPEPRPHEYGGHWGKGQIVRSYLPQSQMTIRVELTASHMGYFEFRICPNPNAK  
QSCLDENVLSILNGSPSQPNESDLDRFYPRNGSCIYEILAQLPDFTCEHCVLQWR  
YVAGNNWGMCGNGIGAIGCGPQEEFRSCDIALTTEYLHPYLSPINPPPSQSNGM  
SANTKHNTVNIQSYKLYICILLILLILVCVVVMSIKFHNHNSFCIPQFCNNQKK  
YLFWNSSQHNNFICDLFKKNITLSNDKLDDPVHKLGD

## Supplementary Note 5

**List of non-redundant full length LPMO sequences from catalytic N-terminal histidine to the C-terminus, identified in the genome of *T. castaneum*. The original gene annotation symbols (according to iBeetle) are shown at the front of each protein sequence.**

>TC016344

HGMLMEPPNRSSLWRFNPNAPVNYDDDQNYCGGMNVQWDQFGGKCGVCGD  
QYDDPHPQANENTGKYGQGIIAKEYTAGSVIDVQVVLTTNHMGYFNFSLCVLED  
PNAPESGEECFKPITLGDGSDKYVLPNTEEDNDTINTTVKLPDGLTCDRCVLRW  
TYTAGNNWGQCEDGSYDEGCGPQETFRSCTDIAIH

>TC016345

HGMMLEPPNRSSLWRFNSSAPINYNDNQNFCCGGFSVQWGKFGGKCGPCGDY  
DDPHPQANENGGKYGRGFVVAEYKAGSVIDVQVKLTANHLGYFKYSLCVLKD  
PNGPEMDEKCFMPLKLVGDSVKYNVWKTDYLIKMKLKLPTKIKCDRCVLRWN  
YRTGNNWGNCGNGTSGLGCGPQETFRSCSDVRIV

>TC016346

HGMMQLQPPNRSSLWRFNPNAPPNYNDNQNYCGGAGVQWASLGGKCGLCGDK  
YDDPHPQANENTGKYGQGIIAAEYKAGSAIDVEVLLTTNHKGGFFNFSLCVLQNP  
NAPESGEDCFQPLKLANGDKQYNVVTGEKTINTKVQLPSGLTCDRCVLRWHYQ  
AGNNWGQCEDGSYDQGCQPQETFRSCADVTIS

>TC016347

HGMMLEPPNRSSLWRFDPTAPVNYNDNQNYCGGASFQWQSMGKCGVCGDP  
YNAPHPQENENTGKYGQGKIVRQYSPGSVVDIQVSLTTNHLGYFLFSVCVLQDP  
SAPESGEECFQPISLANGDDRYNVTFSERTVNTQVKLPDGLTCDRCVLRWHYIG  
GNNWGQCEDGSYQEGCGPQENFRSCADVAIL

>TC016348

HGMMMEPPNRSSLWRFDPTAPPNYDDNQNFCCGGVAVQWKQFNGKCGVCGDI  
YDAPHPQDNENTGTYGQGKVVRTYNSGSVVDITINLTANHMGYFNFSVCVLQD



PNAPESGEECFQPITLANGEPRIYIQSTDKTLIVDTQVKLPDGLKCDRCVLRWHY  
NCGNSWGQCDDGSYAEGCGPQETFRSCADVAIV

>TC016349

HGMMLEPPNRSSLWRYDKSALPNYQDNQNFCCGGYYVQWELNGGRCGVCGDT  
YSDPHPQDNENSGKYGSGKIVRTYEAGSVINVDVWLSKNHLGSFEFSLCEITNPN  
APESGEECFKVLPLADGSQQYNVSAGETDITVALQLPKGKSCAHCVLRWHYRA  
GNNWGDGCGDTWAKGCGSQETFRTCADVAIV

>TC016350

HGMMLEPSNRASLWRFDWKQPSNYNDMGYFCGGVKFGLVTIATMVSKFVTVV  
LALVCLQKVS GHGMLMDPTNRASRWRVDPKAPINYDDNAFFCGGFAVQYEQN  
GGKCGVCGDNYADPVPRSNENTGKFGNGVISKTYTAGSIITANVTLTANHLGSF  
SYSLCVLKDPTKPETEDCFVDLPLADGSSKYPVSADEYEIVNQVQLPAGVTCDR  
CVLRWHYKSGNSWGICTDGTQRMGCGAQETFRSCADIAIVA

>TC002263

HGRLMDPPARNSMWRFGFPNPVNYNDNELFCGGYAVQWEQNGKCGLCGDP  
HHVKEPRPHEAGGLYAKGIISRHYSVGQEIDIEVELTANHYGRFEIFLCPNNPN  
QVATQDCFDRIPLYLSGTRNFVYNIPEDGKKKAIFRYKVQLPPYVTCTQCVLQW  
SYTGNQWGTCPNGTEAQGCGKSETFRNCADVAIHTSAGSAVPPLFVGVNNPY  
LLYYKDFSKPAPYNVYPLVVREQVCPNSLYKSIPGVNEWQCNSCLRYPNCPA  
KICQCPTTCEAIGEYEGHPGADVQCMDECLVYPSKCPLDRCFCYEEFSTN

>TC015490

HGRLIDPPSRASAWRYGFDTPHNYNDHELICGGFTRQWVKNEGKCGVCGDAW  
DSKIPRAHEFGGTYGQGVIVRKYTAGSVINIRVELTANHFGYFTFAVCPDFKRAT  
QKCLDKHVLKLVKPQEGVDHHHSTRYYPKEGNKVYEMKYRLPKATCDHCLFQ  
WRYIAGNNWGTCPNGTGAVGCGPQEEFRACADVITISGKGVQEMEEDTTEVEVE  
VATTTVAAPPSGEETHSPITALVLSLVSFLLVFLILSLLYIHFYQVGKQLKSWLKG  
DKDKEQAPMPPRTRRARNVDGLDEVLDKVESVA

## Supplementary Note 6

**List of non-redundant full length LPMO sequences from catalytic N-terminal histidine to the C-terminus, identified in the genome of *A. gambiae*. The original gene annotation symbol (according to VectorBase) and the proposed new nomenclature (in brackets) are shown at the front of each protein sequence.**

>AGAP001819

HGMALDPIARGSRWRCNPSALPNYTDNELFCGGFQVQWGTHNGKCGVCGDNY  
GDARPRLHELGGPFGPGDIVRQYVVRGVSIEARIRLTANHRGYFYFDLCNLDVGG  
AEDEACFSQYPLSLADGSRNWVLPSTAVGEYRINLKLPSDLTCSHCIFRWTYVA  
GNNWGYCEDGSGRLGCGPQETFKTCSDVRIVASNDINPSFAYCTKAV

>AGAP000266

HGRLMEPPARNAMWRFGFPNPVNYNDNELFCGGYAVQWEQNQGNCGVCGDA  
YHLRAPRPHEAGGEYGKGIYSRRYVAGQELEVEIELTANHMGRFELYLCPNNNP  
RAEATQDCFDYPLYLSGTREVRFFIPPDSKKKDVFRYRVQLPLYVSCTQCVLQ  
WTYFTGNMWGRCDNGTESVGCGRPETFRCADISIVSNTGGGRPPLFVGNNNPF  
LLYRDRFRDPKPDNVYPLIIRDQVCLPTATYRSFIGMEEWCQSNCLRYPPNCPET  
VCHCPQTCEAIGELRGREGADVYCLDQCLNFKSNCPADRCRCY

>AGAP001705

HGRLIEPPSRASAWRYGFSTPPNYNDHELYCGGFNRQWQRNEGKCGECGDPFD  
APLPRPHEFGGKWGQGVIVRRYKPGTTITLRVELTASHMGYFEFRICDNVQAKQ  
DCLDKHLMRIVSGTPSIPHPNDLKTRFYPRNGSRIYDMKAELPADLNCNNCVVQ  
WKYVAGNNWGICPDGNGAVGCGPQEEFRACADVSVSEKDGQDNRTPLRPSQK  
PTPTRAPDSSTEPAEGEQPIEEEPKGVKYMGPLVAIISLFLVLCGFAALYIYHYH  
GGRIKALMRWNREKTQKGAHGTEPIANMGGAGVAHHGDVEANAPVPPPRTKRI  
SNQIRDIDAQESSVLSGSTKRQSPLDITVSRQPSGMD

## Supplementary Note 7

**List of non-redundant full length LPMO sequences from catalytic N-terminal histidine to the C-terminus, identified in the genome of *H. azteca*. The accession identifiers are shown at the front of each protein sequence.**

>XP\_018015775.1

HGRLLDPPARGTMWRLGFQTPPDYNDHELFCGGFHRQWTTNGGRCGECGDPW  
DLPRPRPHEAGGVFGTGTLSRIYRQGQIITAVVHLTANHFGWFEFRLCPTNNPNE  
YAKQSCLNQNILELADSPGTRFVIEDQSQVLFVRVRLKLPRLKCSHCVLQWHYT  
SGNNWGFCKDGNMGGCGKQEIFRGCSVAIFDQSDSTYYKHLNLTDFDFTP  
IINLQDGTMYMRKHQSGEEILAVKQAPESNSDENQNEILDKESRVENAKDDLSD  
LDVDGDGVINIDGNLLSLDALKNHLMSGLLTESPGANSHNEQEDSELQSGFQV  
SSSTSRSRSKFRADRTKEDKKTNIITTSKKRRNYATLNTDIKTQNLGKPSDSVDII  
NSAYISSNTFRKSDQSSHSKYTTTEPPVAPVQYATESSNIAEYTLGPVVVHRPARP  
KAEHSGFNDFPSASSEKSSYMDTSSSHSVLAKPFVPEPEDVLPEILSQLTSLKDFPI  
QKHTSSNDAANAHFISTTDQTRLLEAVKSMFSASQATTPSPATQLHRIESQDNTV  
SIPNIIVSPQSNEMVSFGFRRKPTSPDDHTFPAGIFSTITETATKSSRKAKPMPQAR  
QSRPRTATPQTLDDVQATIRTLAAQTQLFSKLNPDCKSREPKPLSSLSTDESIASH  
TVWKSFKPKSSSVRMSKIETSPVRHERPNSLVTRAPLTDLTRHRDLPEPNLSSASR  
TPFSAIASQALFSQVPDMAGAMAFQVPLSKLRDTATLDRLLELKMSLLPEDERQ  
AHLDPVLLIIM

>XP\_018009620.1

HGRLIEPPSRASAWRFGFSTPRDYNDNEGFCGGKAKQHDVNGGRCGVCGDSWE  
LQPRPHEVGGLYATGIIVRNYSTGQVIEATAQITANHKGFFEFRICPTNDPSIEATQ  
DCLDRYPLYGVGSSDHRLYIGHNNGNHSFRLRLPQQLNCRHCVLQWRYVAGN  
DWGICYDGSALGCGPQEEFRACADVSIADRGSHPAREARRRTTHASTNPRRR  
VTVAPVDDAPQDDVVLTTQTGRACEARGIWRAVPGMHAWCTTNCNHTPAFCPT  
SHCWCT

>XP\_018007939.1

HGRLMDPIARNAMWRAGFPNPVNYNDNELYCGGFVVQYQQNGGKCGVCGDV  
WTEKPPRSHEAGGLFGNAIIAKRYTSGQVIDIEAELTTNHMGNMEVRLCPNNDP

DAAITEDCFEKYLLGLADGSDSVFVIPEGTKKSEIFRWKVKLPEDVTCSHCVIRW  
KYFAGNTWKGKCDNGSESVGCGNQETFINCADVIINSNTATAAATSDFNPWALYS  
SRDNVVQNVSAEEAAQQGLKPLIIRAQRCIPIDPFHNVANMDMWCMINCLKYPP  
NCHPSYCKCVHDCSAVGEFALIEDADIWCHQNCLKHPSYCPPERCHCV

>XP\_018028131.1

HGRLIQPPARSTAWRYGFPTPVNYNDHETYCGGYGRQWGVNRGKCGPCGDPW  
DMPQPRDNEEGGKYGTGVITATYKEGAEVELGVELTANHQGFFEFRLCPNNNP  
WYYPGTRKMYMRYALPSGLTCTQCVLQWRYVAASNWGDCGNGTGRMGCG  
PQEEFRACADISIISDDGTANSSPAAPVDVTVSPVDEDYNEVDTGRLHEQEAHQL  
QESNYIGHVVALTLAFVLLPLLLLALVIYFYFAREKVRKFVRKNLDCWKKTVGG  
VTVPEGPLDGVDPGLLEAKNPNRSSLEFPNHPYGAAPTAPRRNRGRSPSVSSNR  
GEEQSASPNPV

>XP\_018020658.1

HVALMEPPARNVLRAGYPNLPKHEDDDYLYCIEKEEKNCPPCGDTIDSPQPYA  
HQAGGKWALGHIGRNYSAGETISVGVNVTNSHGGHMVFKLCPNNDVTKPVTQE  
CLDRYPLSASGYPDGKVPVTSPYQETQEFNLKIKLPQDVVCSQCVLQMTQYTEQ  
FKPAKVMFRNCADIGIIDPRSASSHARQNRFASTSKSLTNGFTQQGFLDQSAGFG  
LAGQQQFRTALQEPSSFLTIADQLSAYGGSPQFGQLAFDNHSPQVQSSSVHSQTP  
TFAYEPDFMNGQFDFKSALEFNNQQSLQQVGDGNNRENFQLPSRPEFDIINSGNP  
QVAAANKQDQKFKTAKFLSASAPQQFSSLSPLSPQVPFTRTIQGTENFSKFQNSK  
QISHQIGAPFVQQKPQAVEIYGFVGNVGGKKQKNNAKRDSANFAPSSSDSQFRSRS  
KAMFPEQGSQQSPGYILAHY
